# Supplementary material for: Metal-free domino amination-Knoevenagel condensation approach to access new coumarins as potent nanomolar inhibitors of VEGFR-2 and EGFR
Source: PubMed Central journal article supplement (PMC9273165; doi:10.1080/17518253.2021.1981462), 2021-09-24
Supplement: NIHMS1761482-supplement-SI.pdf [file NIHMS1761482-supplement-SI.pdf]

## Supporting Information

## Metal-Free Domino Amination-Knoevenagel Condensation Approach to Access New Coumarins as Potent Nanomolar Inhibitors of VEGFR-2 and EGFR

Essam M. Eliwa<sup>a,b\*</sup>, Marcel Frese<sup>a</sup>, Ahmed H. Halawa<sup>b</sup>, Maha M. Soltan<sup>c</sup>, Larissa V. Ponomareva<sup>d,e</sup>, Jon S. Thorson<sup>d,e</sup>, Khaled A. Shaaban<sup>d,e</sup>, Mohamed Shaaban<sup>a,f</sup>, Ahmed M. El-Agrody<sup>b\*</sup> & Norbert Sewald<sup>a</sup>

<sup>a</sup> *Organic and Bioorganic Chemistry, Faculty of Chemistry, Bielefeld University, Bielefeld D-33501, Germany*

<sup>b</sup> *Chemistry Department, Faculty of Science, Al-Azhar University, Nasr City-Cairo 11884, Egypt*

<sup>c</sup> *Biology Unit, Central Laboratory for Pharmaceutical and Drug Industries Research Division, Chemistry of Medicinal Plants Department, Pharmaceutical and Drug Industries Research Division, National Research Centre, El Buhouth St. 33 Dokki-Giza Cairo 12622, Egypt*

<sup>d</sup> *Center for Pharmaceutical Research and Innovation, University of Kentucky, Lexington, Kentucky 40536, United States*

<sup>e</sup> *Department of Pharmaceutical Sciences, College of Pharmacy, University of Kentucky, Lexington, Kentucky 40536, United States*

<sup>f</sup> *Chemistry of Natural Compounds Department, Pharmaceutical and Drug Industries Research Division, National Research Centre, El-Behoos St. 33, Dokki-Cairo 12622, Egypt*

\* Corresponding authors (emails: [essameliwa85@azhar.edu.eg](mailto:essameliwa85@azhar.edu.eg); [elagrody\\_am@azhar.edu.eg](mailto:elagrody_am@azhar.edu.eg))

## Table of Contents

| Figures                                                                                     | Page No. |
|---------------------------------------------------------------------------------------------|----------|
| <b>Figure S1.</b> <sup>1</sup> H NMR (500 MHz, DMSO- <i>d</i> <sub>6</sub> ) of <b>4a</b>   | 4        |
| <b>Figure S2.</b> <sup>13</sup> C NMR (125 MHz, DMSO- <i>d</i> <sub>6</sub> ) of <b>4a</b>  | 4        |
| <b>Figure S3.</b> (+)-ESI-MS of <b>4a</b>                                                   | 5        |
| <b>Figure S4.</b> <sup>1</sup> H NMR (500 MHz, DMSO- <i>d</i> <sub>6</sub> ) of <b>4b</b>   | 5        |
| <b>Figure S5.</b> <sup>13</sup> C NMR (125 MHz, DMSO- <i>d</i> <sub>6</sub> ) of <b>4b</b>  | 6        |
| <b>Figure S6.</b> (+)-ESI-MS of <b>4b</b>                                                   | 6        |
| <b>Figure S7.</b> <sup>1</sup> H NMR (500 MHz, DMSO- <i>d</i> <sub>6</sub> ) of <b>4c</b>   | 7        |
| <b>Figure S8.</b> <sup>13</sup> C NMR (125 MHz, DMSO- <i>d</i> <sub>6</sub> ) of <b>4c</b>  | 7        |
| <b>Figure S9.</b> (+)-ESI-MS of <b>4c</b>                                                   | 8        |
| <b>Figure S10.</b> <sup>1</sup> H NMR (500 MHz, DMSO- <i>d</i> <sub>6</sub> ) of <b>4d</b>  | 8        |
| <b>Figure S11.</b> <sup>13</sup> C NMR (125 MHz, DMSO- <i>d</i> <sub>6</sub> ) of <b>4d</b> | 9        |
| <b>Figure S12.</b> (+)-ESI-MS of <b>4d</b>                                                  | 9        |
| <b>Figure S13.</b> <sup>1</sup> H NMR (500 MHz, DMSO- <i>d</i> <sub>6</sub> ) of <b>4e</b>  | 10       |
| <b>Figure S14.</b> <sup>13</sup> C NMR (125 MHz, DMSO- <i>d</i> <sub>6</sub> ) of <b>4e</b> | 10       |
| <b>Figure S15.</b> (+)-ESI-MS of <b>4e</b>                                                  | 11       |
| <b>Figure S16.</b> <sup>1</sup> H NMR (500 MHz, DMSO- <i>d</i> <sub>6</sub> ) of <b>4f</b>  | 11       |
| <b>Figure S17.</b> <sup>13</sup> C NMR (125 MHz, DMSO- <i>d</i> <sub>6</sub> ) of <b>4f</b> | 12       |

|                                                                                             |    |
|---------------------------------------------------------------------------------------------|----|
| <b>Figure S18.</b> (+)-ESI-MS of <b>4f</b>                                                  | 12 |
| <b>Figure S19.</b> <sup>1</sup> H NMR (500 MHz, DMSO- <i>d</i> <sub>6</sub> ) of <b>8a</b>  | 13 |
| <b>Figure S20.</b> <sup>13</sup> C NMR (125 MHz, DMSO- <i>d</i> <sub>6</sub> ) of <b>8a</b> | 13 |
| <b>Figure S21.</b> (+)-ESI-MS of <b>8a</b>                                                  | 14 |
| <b>Figure S22.</b> <sup>1</sup> H NMR (500 MHz, DMSO- <i>d</i> <sub>6</sub> ) of <b>8b</b>  | 14 |
| <b>Figure S23.</b> <sup>13</sup> C NMR (125 MHz, DMSO- <i>d</i> <sub>6</sub> ) of <b>8b</b> | 15 |
| <b>Figure S24.</b> (+)-ESI-MS of <b>8b</b>                                                  | 15 |
| <b>Figure S25.</b> <sup>1</sup> H NMR (500 MHz, DMSO- <i>d</i> <sub>6</sub> ) of <b>8c</b>  | 16 |
| <b>Figure S26.</b> <sup>13</sup> C NMR (125 MHz, DMSO- <i>d</i> <sub>6</sub> ) of <b>8c</b> | 16 |
| <b>Figure S27.</b> (+)-ESI-MS of <b>8c</b>                                                  | 17 |
| <b>Figure S28.</b> (+)-ESI-MS of <b>8d</b>                                                  | 17 |
| <b>Figure S29.</b> <sup>1</sup> H NMR (500 MHz, DMSO- <i>d</i> <sub>6</sub> ) of <b>8e</b>  | 18 |
| <b>Figure S30.</b> <sup>13</sup> C NMR (125 MHz, DMSO- <i>d</i> <sub>6</sub> ) of <b>8e</b> | 18 |
| <b>Figure S31.</b> (+)-ESI-MS of <b>8e</b>                                                  | 19 |
| <b>Figure S32.</b> <sup>1</sup> H NMR (500 MHz, DMSO- <i>d</i> <sub>6</sub> ) of <b>5a</b>  | 19 |
| <b>Figure S33.</b> <sup>13</sup> C NMR (125 MHz, DMSO- <i>d</i> <sub>6</sub> ) of <b>5a</b> | 20 |
| <b>Figure S34.</b> (+)-ESI-MS of <b>5a</b>                                                  | 20 |
| <b>Figure S35A.</b> <sup>1</sup> H NMR (500 MHz, DMSO- <i>d</i> <sub>6</sub> ) of <b>5d</b> | 21 |
| <b>Figure S35B.</b> <sup>1</sup> H NMR (500 MHz, DMSO- <i>d</i> <sub>6</sub> ) of <b>5d</b> | 21 |
| <b>Figure S36.</b> <sup>13</sup> C NMR (125 MHz, DMSO- <i>d</i> <sub>6</sub> ) of <b>5d</b> | 22 |
| <b>Figure S37.</b> (+)-ESI-MS of <b>5d</b>                                                  | 22 |
| <b>Figure S38A.</b> <sup>1</sup> H NMR (500 MHz, DMSO- <i>d</i> <sub>6</sub> ) of <b>5e</b> | 23 |
| <b>Figure S38B.</b> <sup>1</sup> H NMR (500 MHz, DMSO- <i>d</i> <sub>6</sub> ) of <b>5e</b> | 23 |
| <b>Figure S39.</b> <sup>13</sup> C NMR (125 MHz, DMSO- <i>d</i> <sub>6</sub> ) of <b>5e</b> | 24 |
| <b>Figure S40.</b> (+)-ESI-MS of <b>5e</b>                                                  | 24 |
| <b>Figure S41A.</b> <sup>1</sup> H NMR (500 MHz, DMSO- <i>d</i> <sub>6</sub> ) of <b>5f</b> | 25 |
| <b>Figure S41B.</b> <sup>1</sup> H NMR (500 MHz, DMSO- <i>d</i> <sub>6</sub> ) of <b>5f</b> | 25 |
| <b>Figure S42.</b> <sup>13</sup> C NMR (125 MHz, DMSO- <i>d</i> <sub>6</sub> ) of <b>5f</b> | 26 |
| <b>Figure S43.</b> (+)-ESI-MS of <b>5f</b>                                                  | 26 |
| <b>Figure S44A.</b> <sup>1</sup> H NMR (500 MHz, DMSO- <i>d</i> <sub>6</sub> ) of <b>9a</b> | 27 |
| <b>Figure S44B.</b> <sup>1</sup> H NMR (500 MHz, DMSO- <i>d</i> <sub>6</sub> ) of <b>9a</b> | 27 |
| <b>Figure S45.</b> <sup>13</sup> C NMR (125 MHz, DMSO- <i>d</i> <sub>6</sub> ) of <b>9a</b> | 28 |
| <b>Figure S46.</b> (+)-ESI-MS of <b>9a</b>                                                  | 28 |
| <b>Figure S47A.</b> <sup>1</sup> H NMR (500 MHz, DMSO- <i>d</i> <sub>6</sub> ) of <b>9d</b> | 29 |
| <b>Figure S47B.</b> <sup>1</sup> H NMR (500 MHz, DMSO- <i>d</i> <sub>6</sub> ) of <b>9d</b> | 29 |
| <b>Figure S48.</b> <sup>13</sup> C NMR (125 MHz, DMSO- <i>d</i> <sub>6</sub> ) of <b>9d</b> | 30 |

---

|                                                                                   |    |
|-----------------------------------------------------------------------------------|----|
| <b>Figure S49.</b> (+)-ESI-MS of <b>9d</b>                                        | 30 |
| <b>Figure S50.</b> $^1\text{H}$ NMR (500 MHz, $\text{DMSO-}d_6$ ) of <b>9e</b>    | 31 |
| <b>Figure S51.</b> $^{13}\text{C}$ NMR (125 MHz, $\text{DMSO-}d_6$ ) of <b>9e</b> | 31 |
| <b>Figure S52.</b> (+)-ESI-MS of <b>9e</b>                                        | 32 |
| <b>Figure S53.</b> $^1\text{H}$ NMR (500 MHz, $\text{DMSO-}d_6$ ) of <b>9f</b>    | 32 |
| <b>Figure S54.</b> $^{13}\text{C}$ NMR (125 MHz, $\text{DMSO-}d_6$ ) of <b>9f</b> | 33 |
| <b>Figure S55.</b> (+)-ESI-MS of <b>9f</b>                                        | 33 |

---

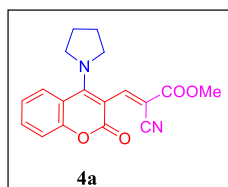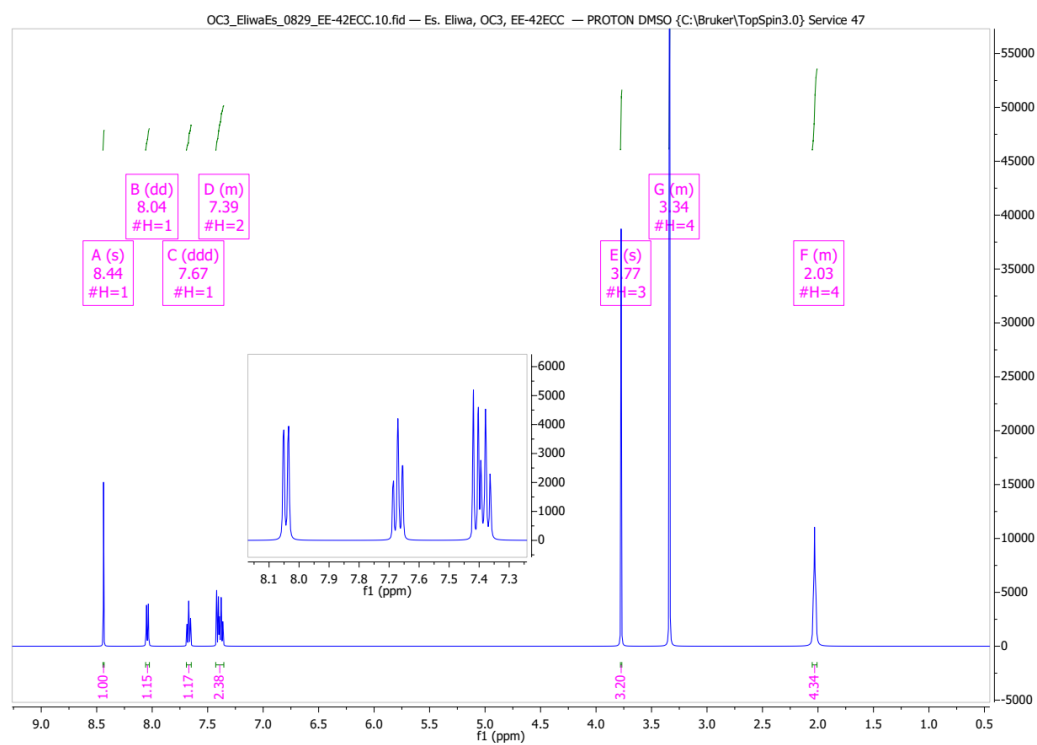

**Figure S1.**  $^1\text{H}$  NMR (500 MHz,  $\text{DMSO-}d_6$ ) of **4a**.

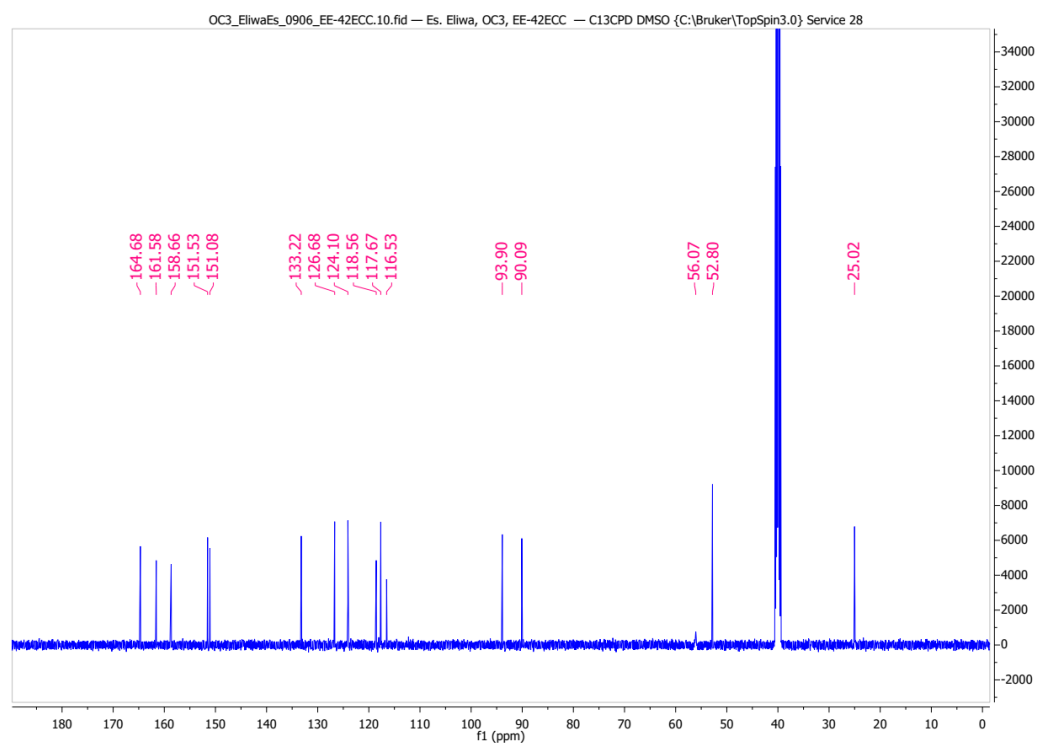

**Figure S2.**  $^{13}\text{C}$  NMR (125 MHz,  $\text{DMSO-}d_6$ ) of **4a**

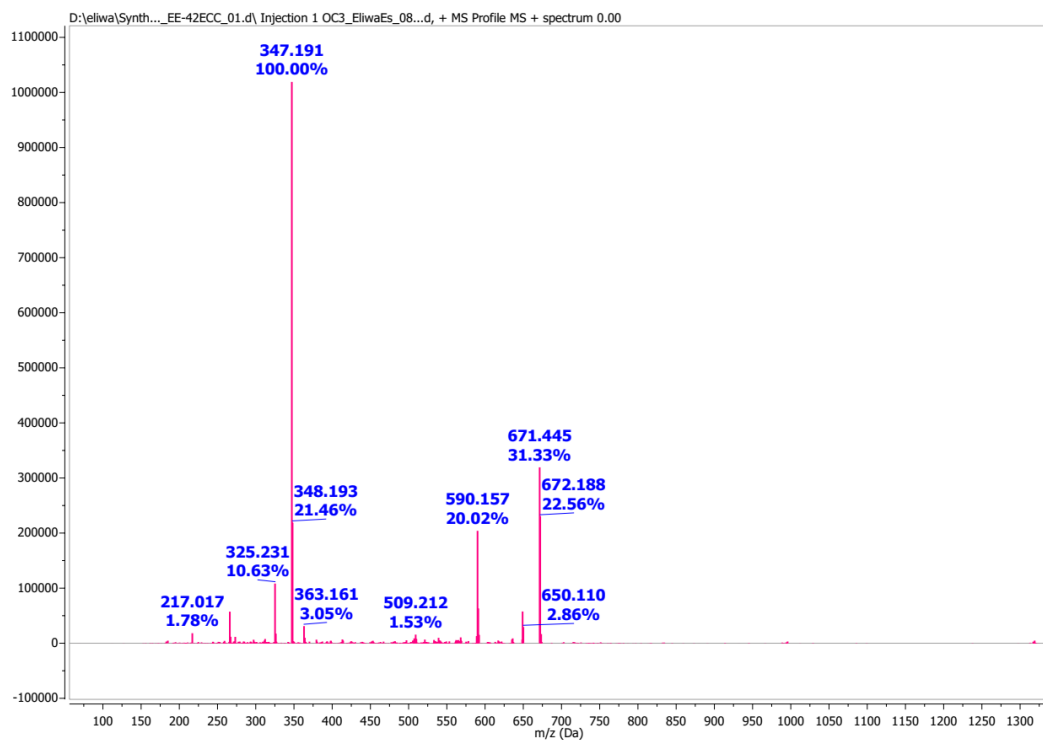

**Figure S3.** (+)-ESI-MS of **4a**

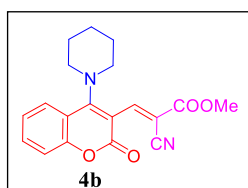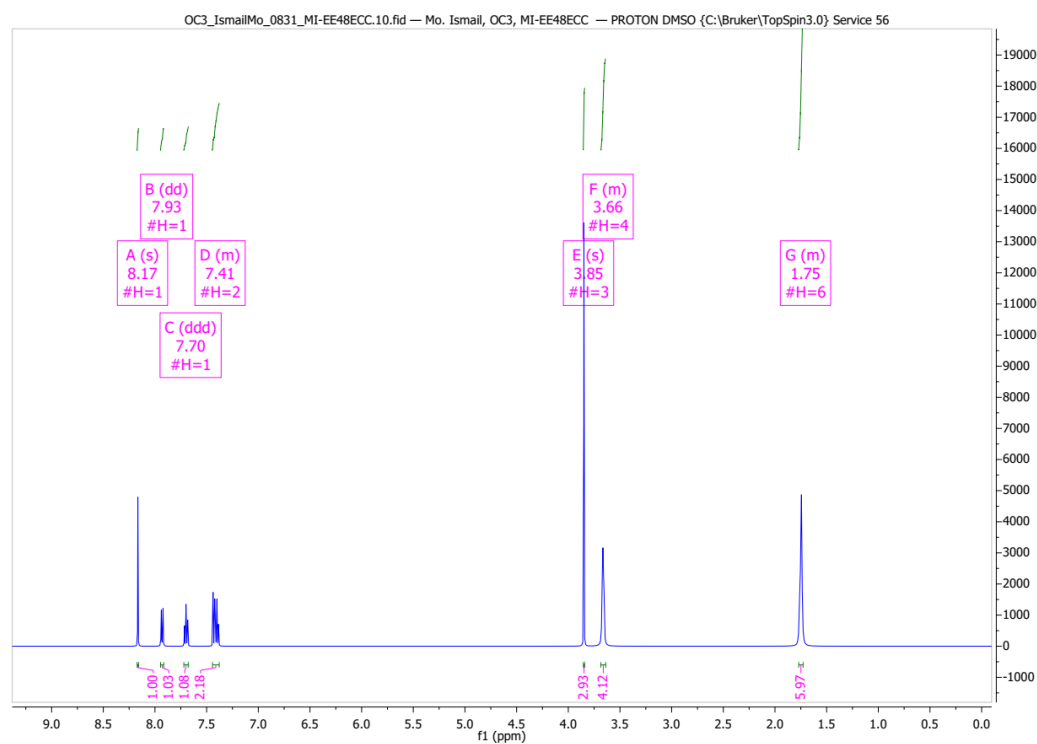

**Figure S4.**  $^1\text{H}$  NMR (500 MHz,  $\text{DMSO-}d_6$ ) of **4b**

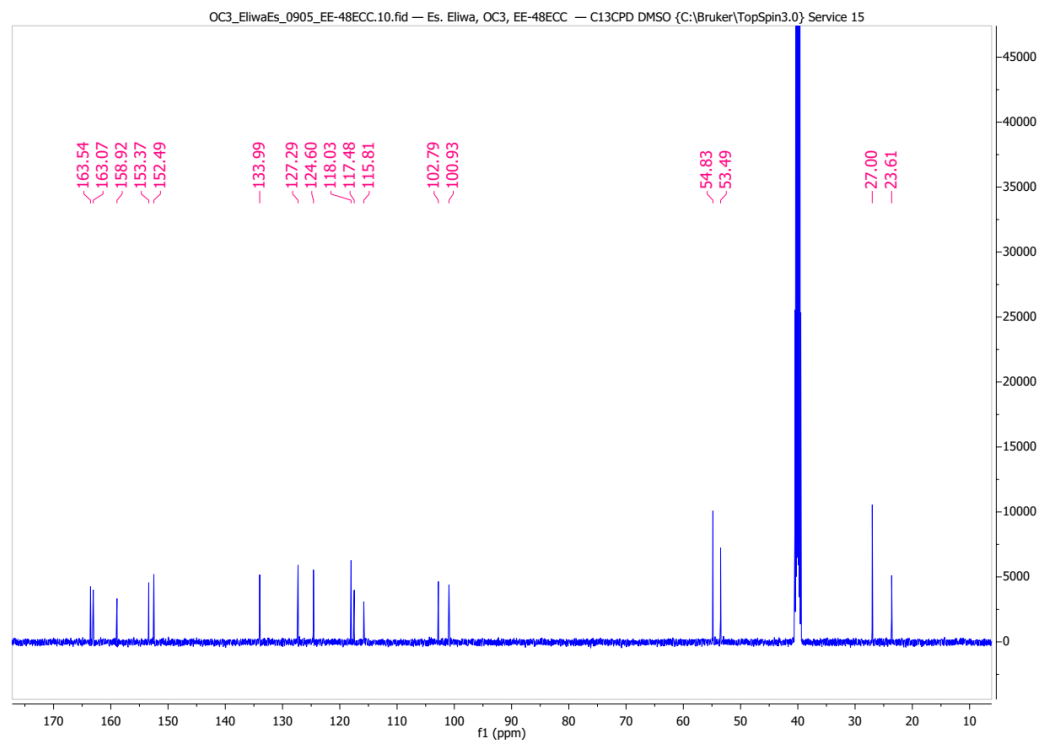

Figure S5.  $^{13}\text{C}$  NMR (125 MHz,  $\text{DMSO}-d_6$ ) of **4b**

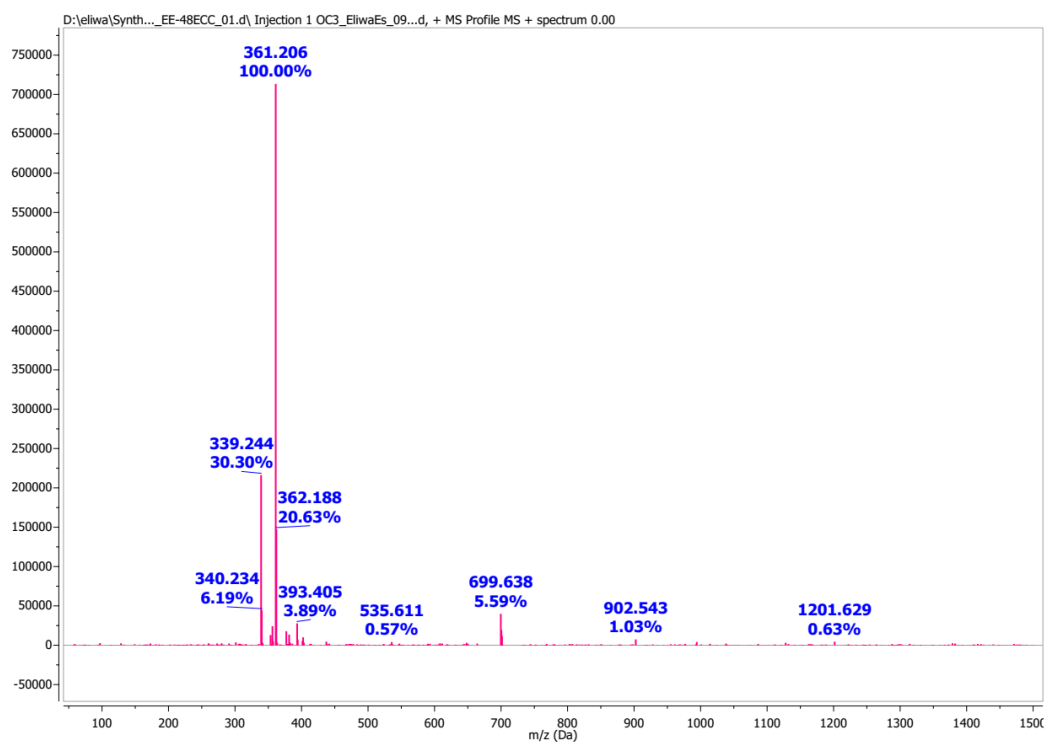

Figure S6. (+)-ESI-MS of **4b**

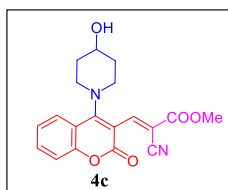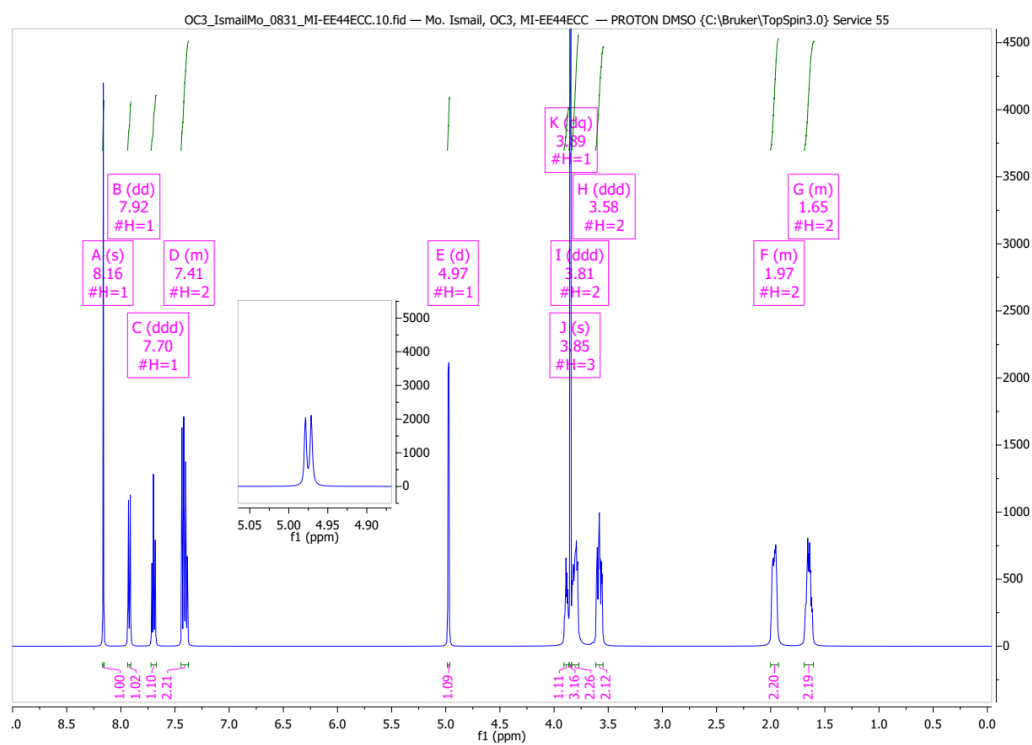

**Figure S7.**  $^1\text{H}$  NMR (500 MHz,  $\text{DMSO}-d_6$ ) of **4c**

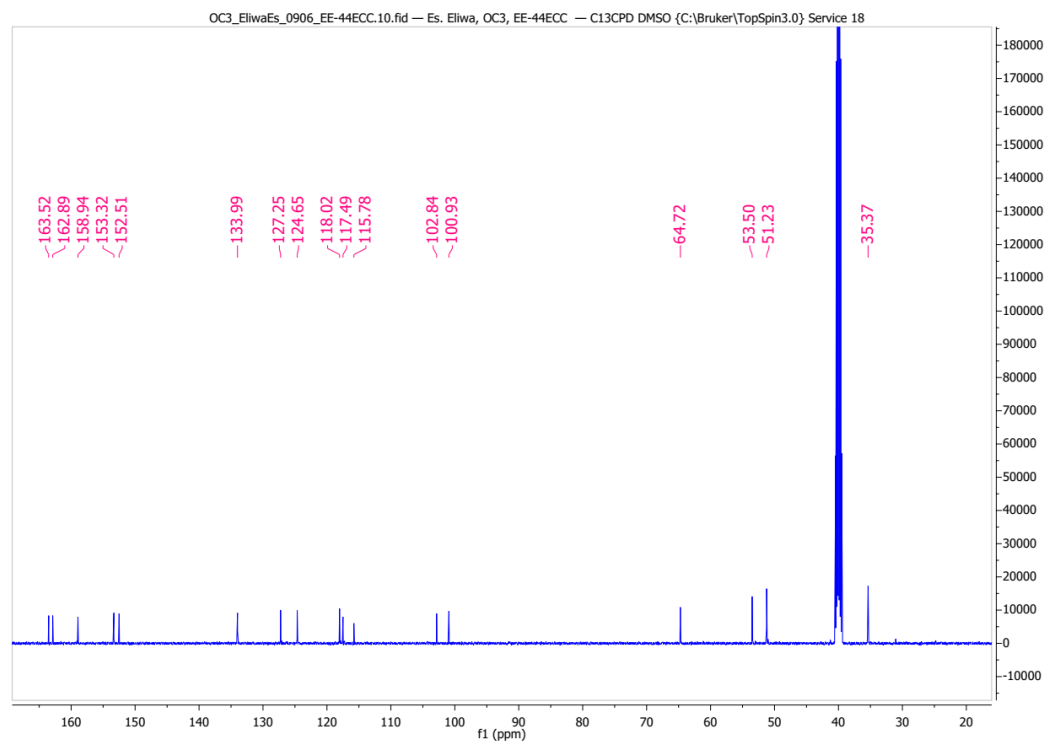

**Figure S8.**  $^{13}\text{C}$  NMR (125 MHz,  $\text{DMSO}-d_6$ ) of **4c**

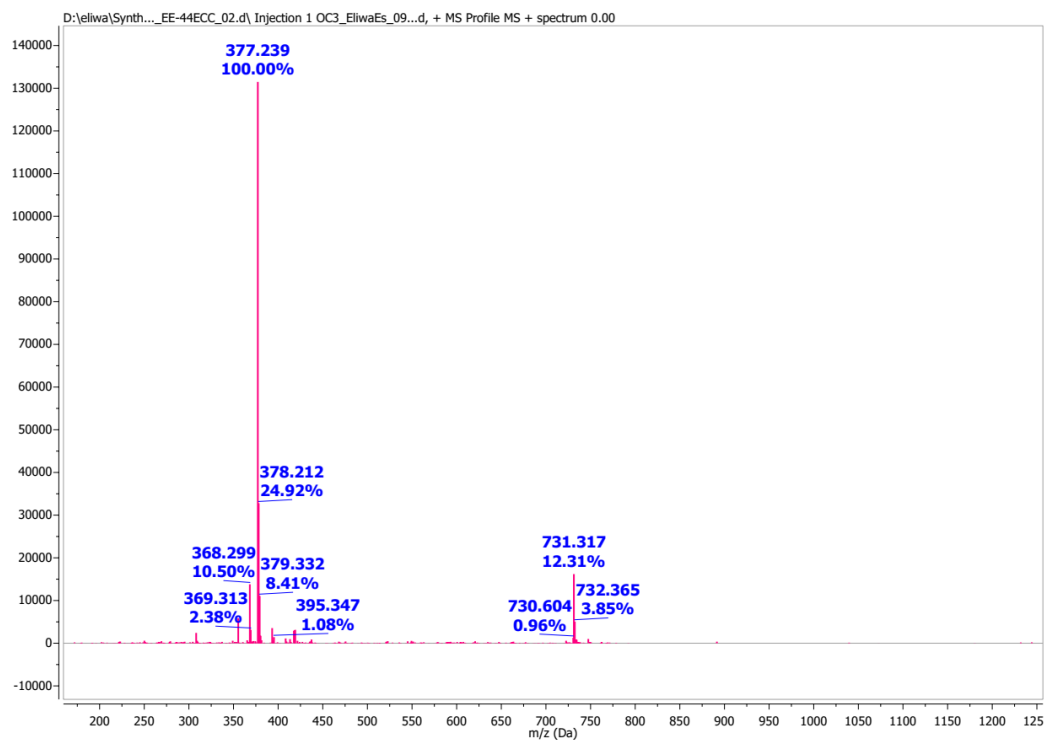

**Figure S9.** (+)-ESI-MS of **4c**

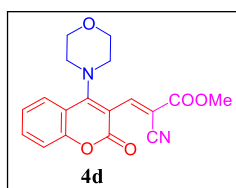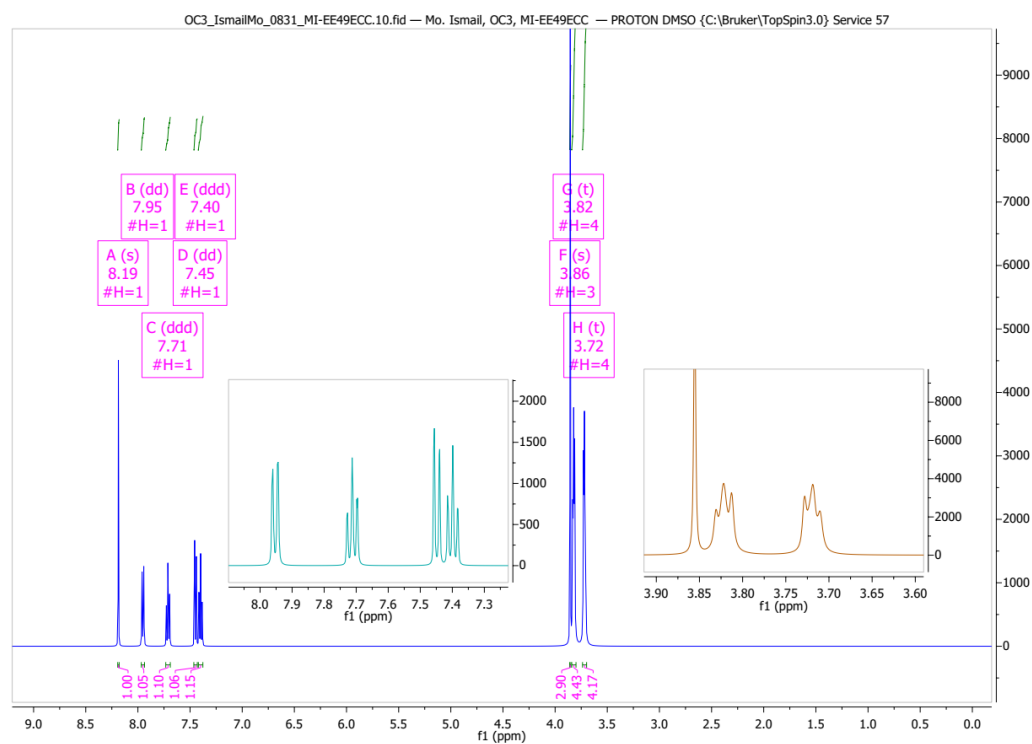

**Figure S10.**  $^1\text{H}$  NMR (500 MHz,  $\text{DMSO-}d_6$ ) of **4d**



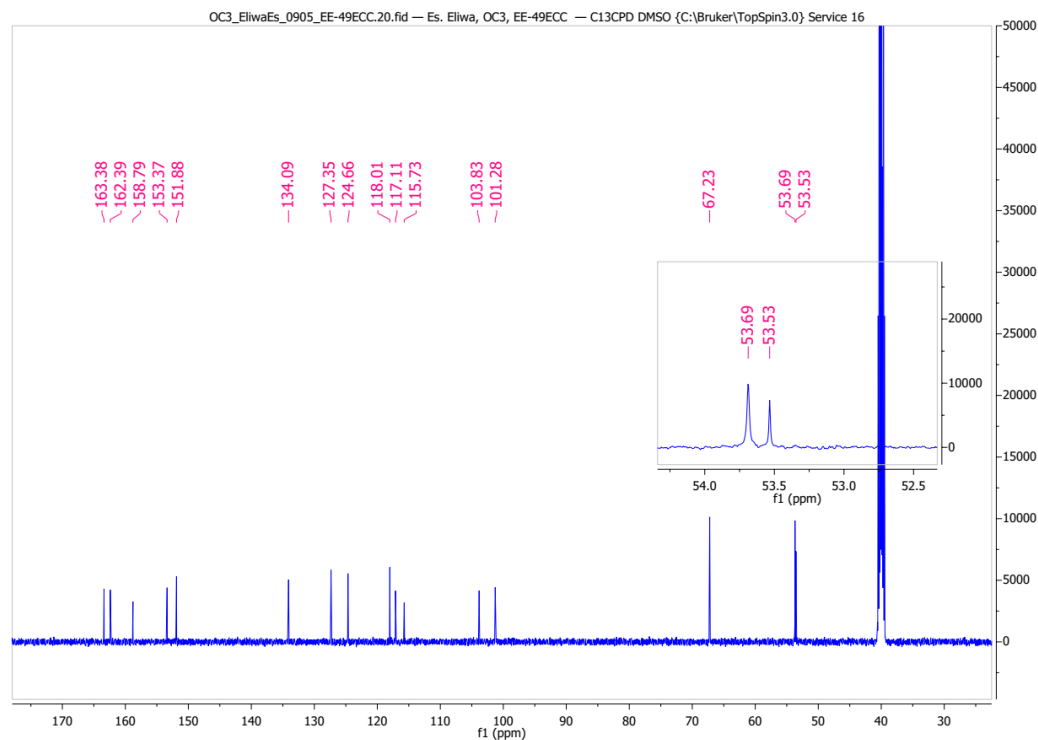

**Figure S11.**  $^{13}\text{C}$  NMR (125 MHz,  $\text{DMSO-}d_6$ ) of **4d**

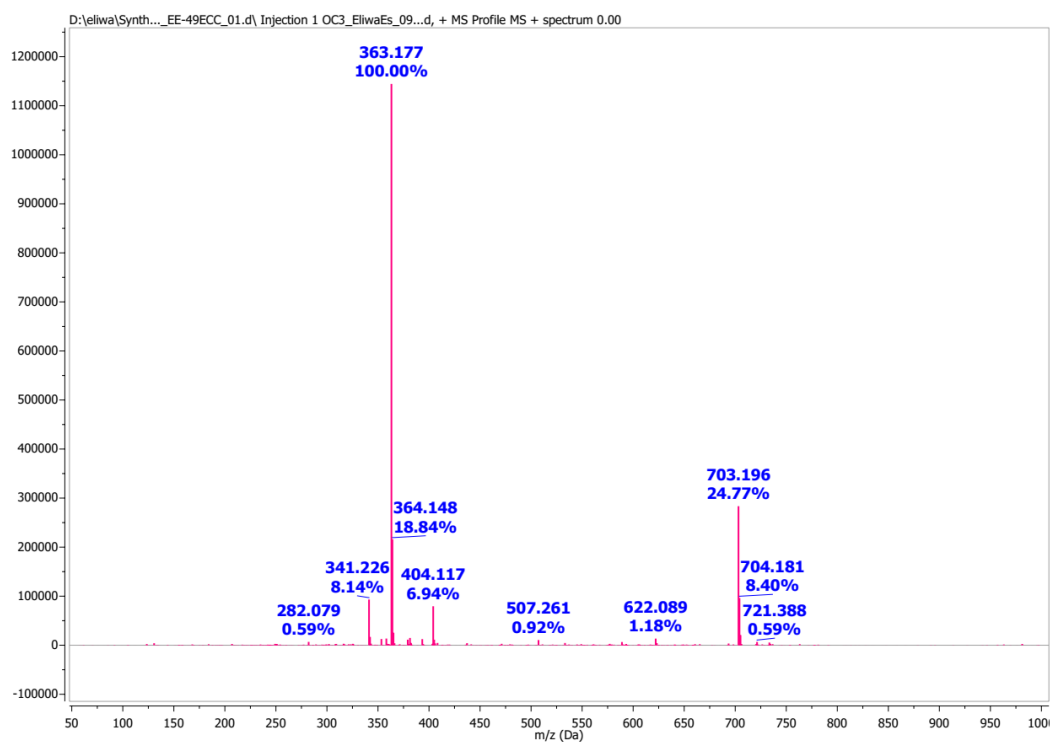

**Figure S12.** (+)-ESI-MS of **4d**

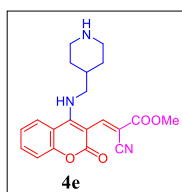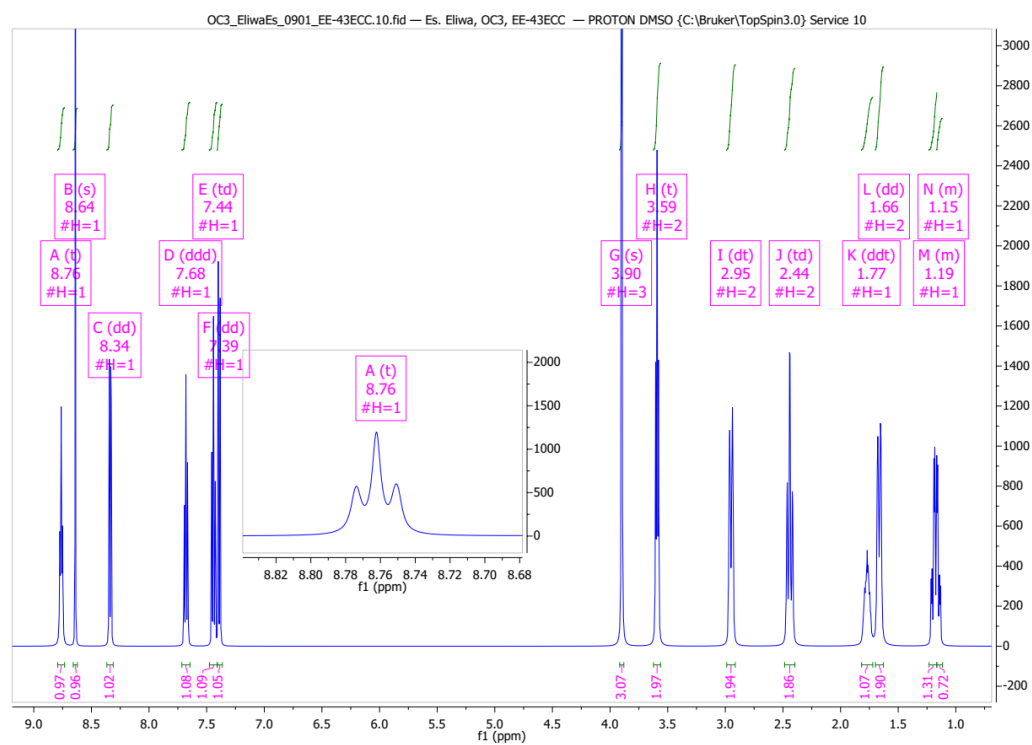

**Figure S13.**  $^1\text{H}$  NMR (500 MHz,  $\text{DMSO-}d_6$ ) of **4e**

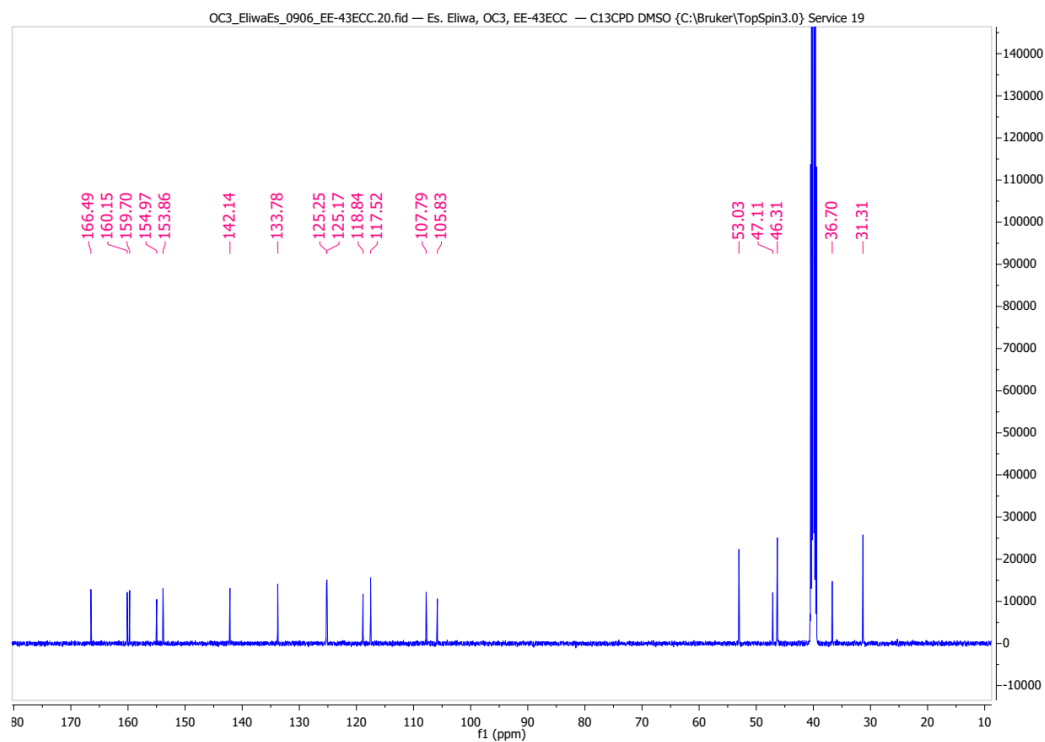

**Figure S14.**  $^{13}\text{C}$  NMR (125 MHz,  $\text{DMSO-}d_6$ ) of **4e**

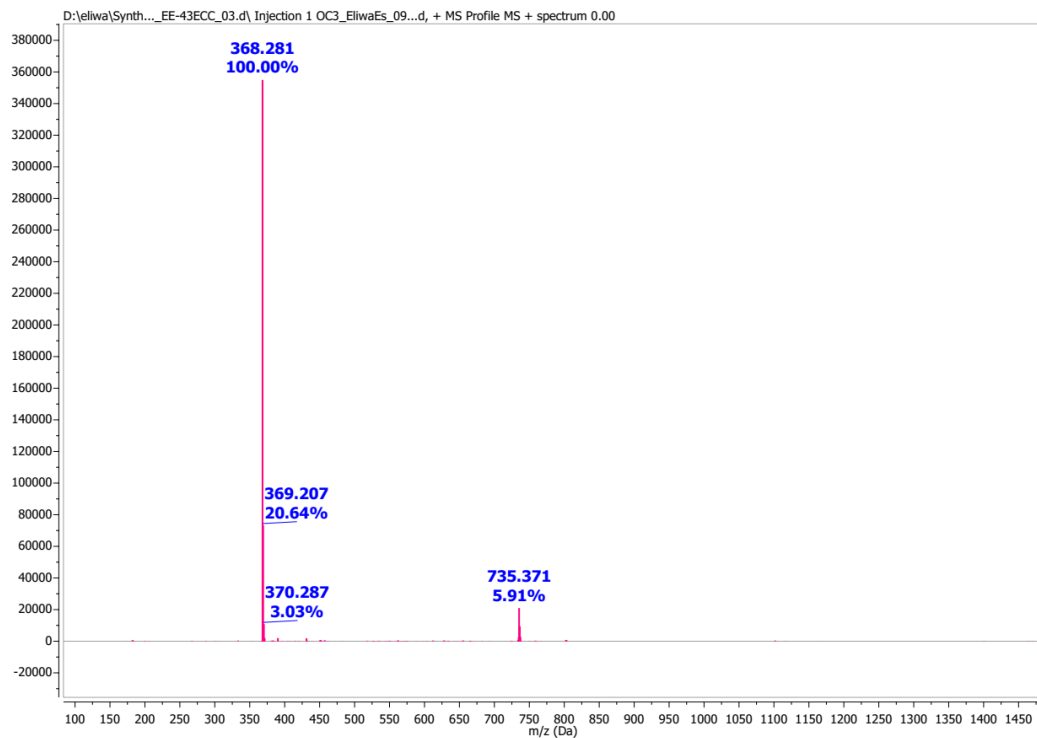

**Figure S15.** (+)-ESI-MS of **4e**

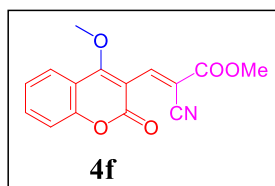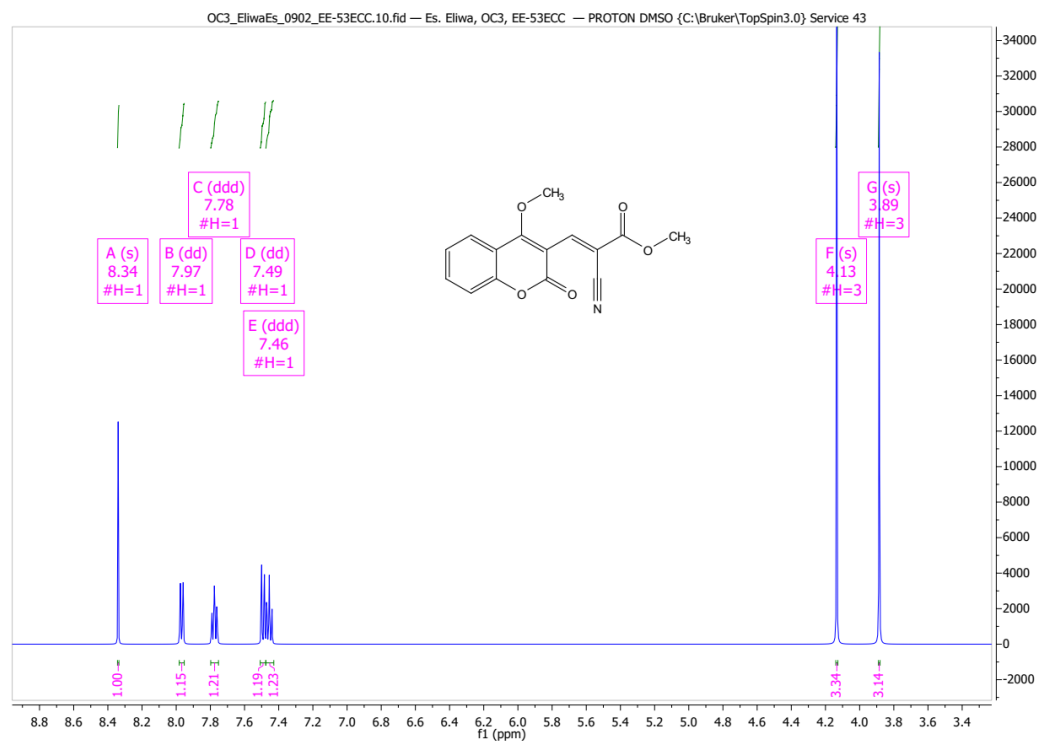

**Figure S16.**  $^1\text{H}$  NMR (500 MHz,  $\text{DMSO-}d_6$ ) of **4f**

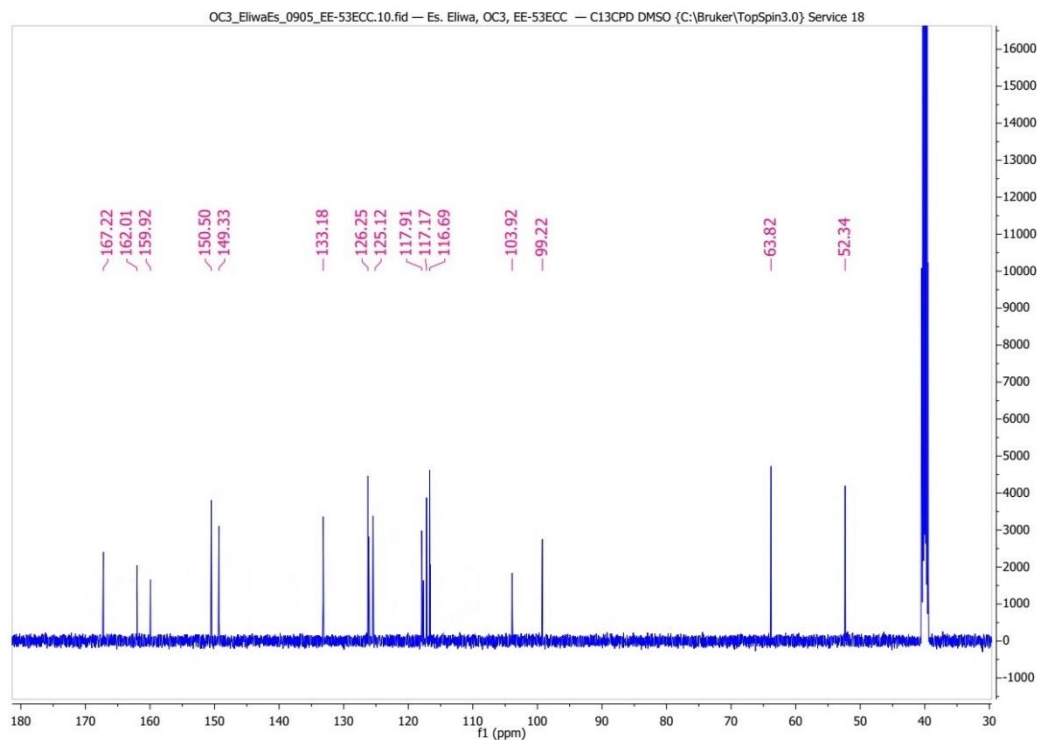

Figure S17.  $^{13}\text{C}$  NMR (125 MHz,  $\text{DMSO-}d_6$ ) of **4f**

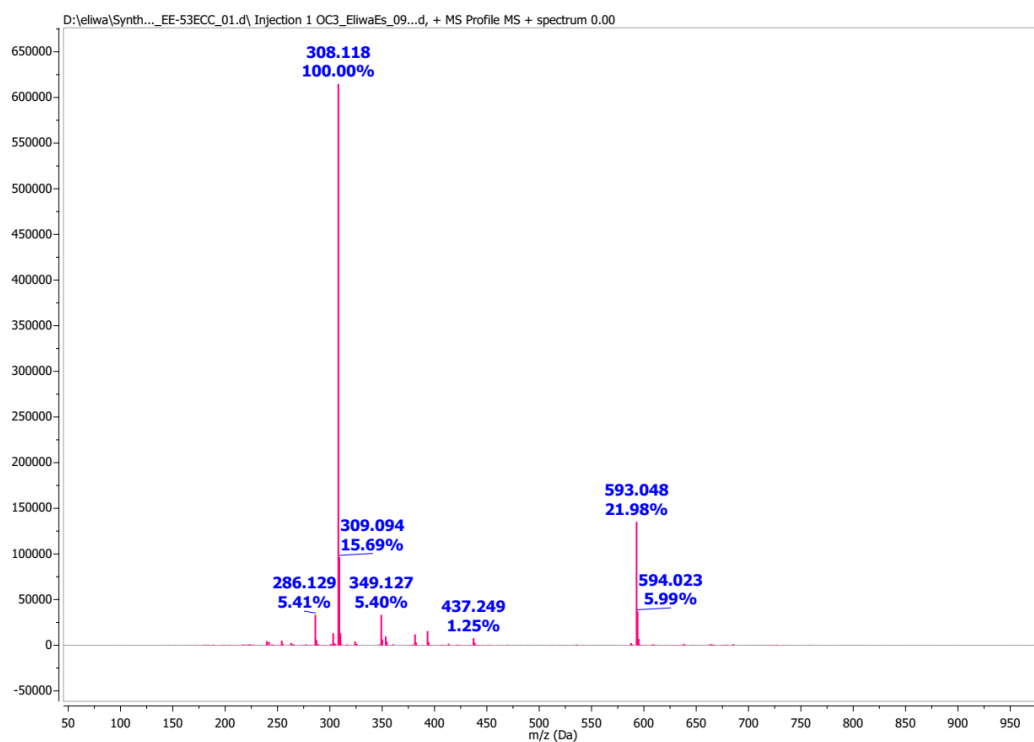

Figure S18. (+)-ESI-MS of **4f**

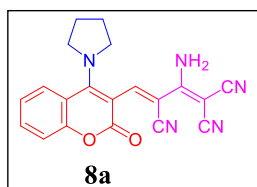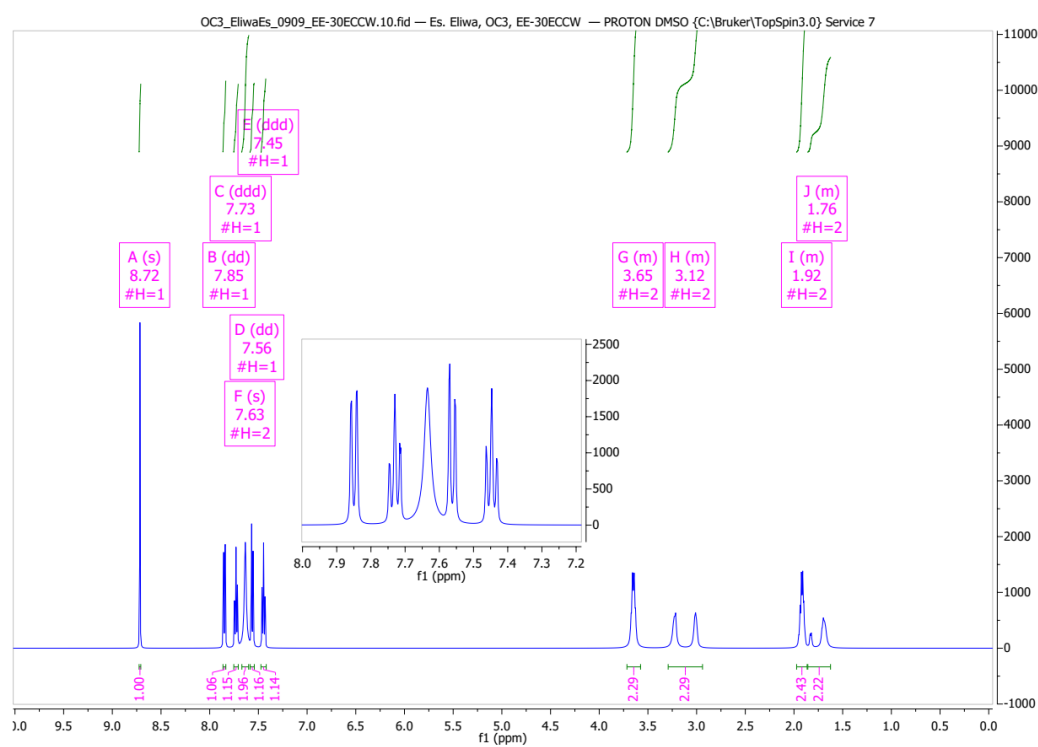

**Figure S19.**  $^1\text{H}$  NMR (500 MHz,  $\text{DMSO-}d_6$ ) of **8a**

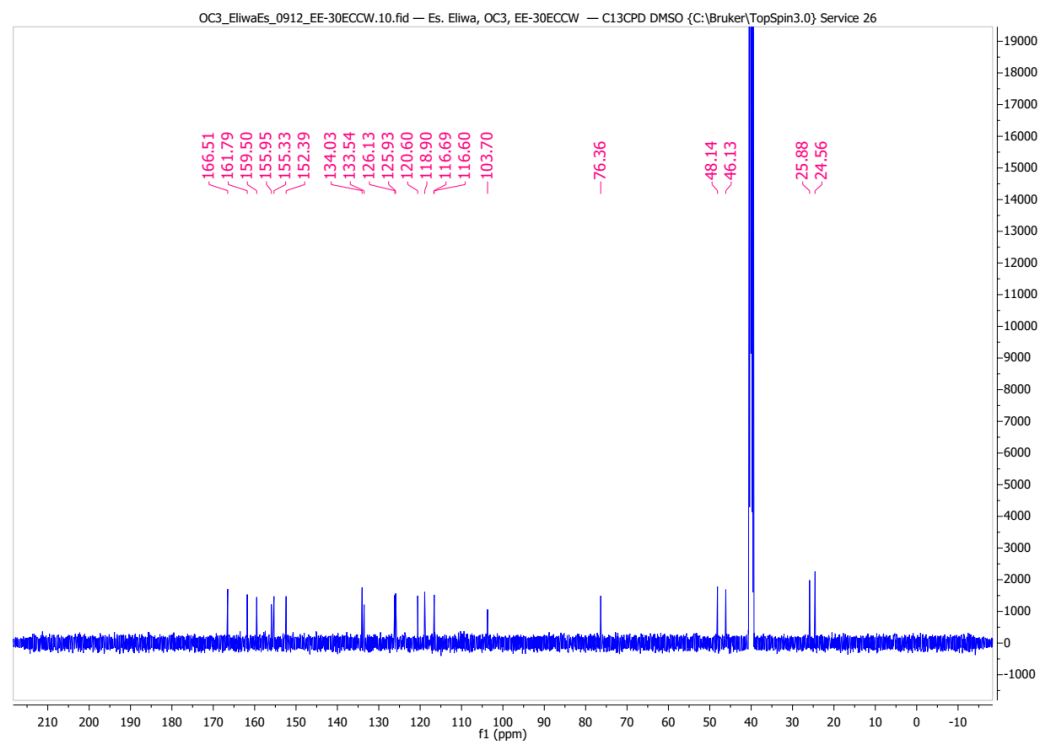

**Figure S20.**  $^{13}\text{C}$  NMR (125 MHz,  $\text{DMSO-}d_6$ ) of **8a**

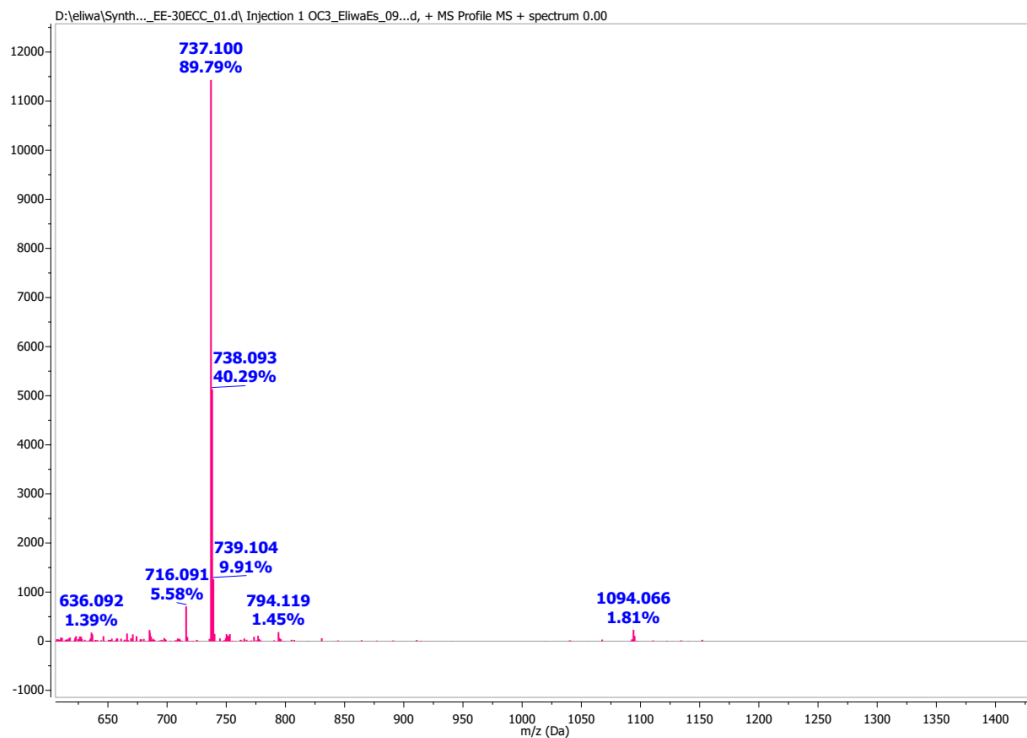Figure S21. (+)-ESI-MS of **8a**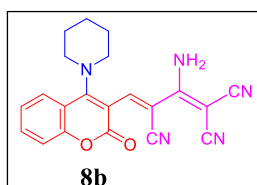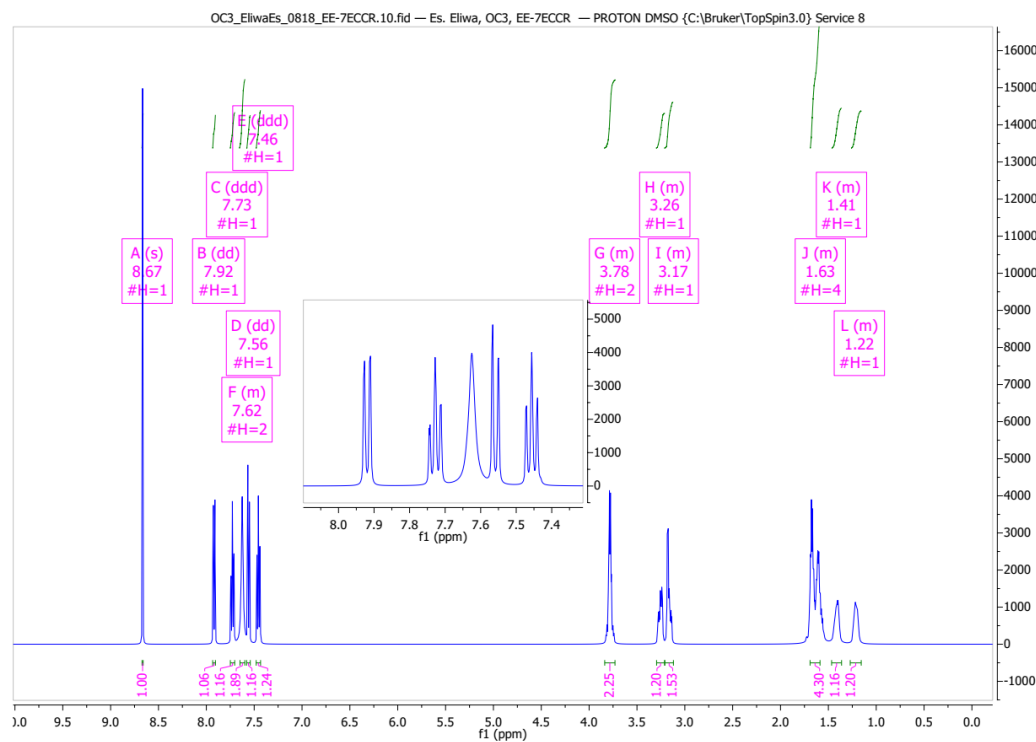Figure S22. <sup>1</sup>H NMR (500 MHz, DMSO-*d*<sub>6</sub>) of **8b**

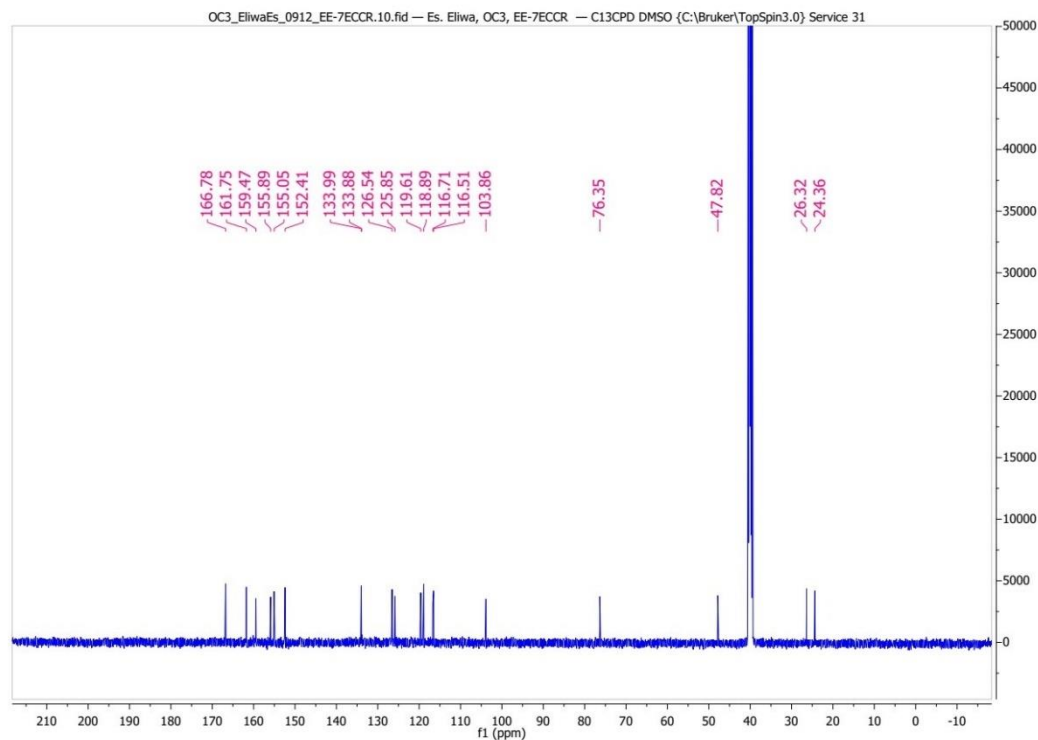

Figure S23.  $^{13}\text{C}$  NMR (125 MHz,  $\text{DMSO-}d_6$ ) of **8b**

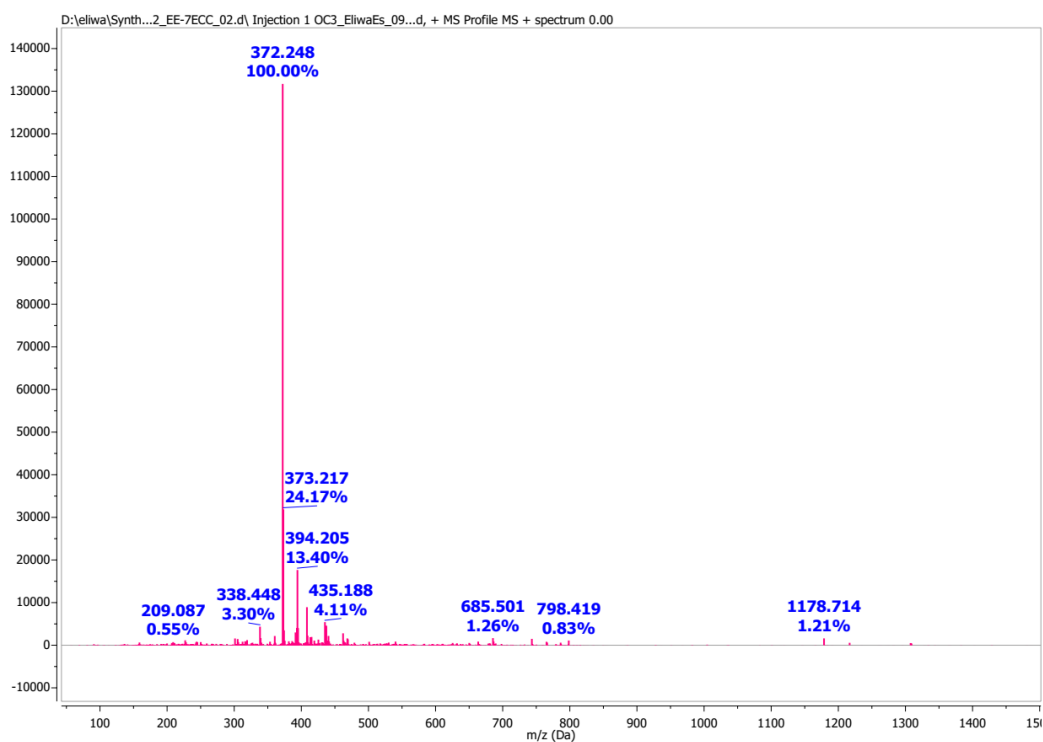

Figure S24. (+)-ESI-MS of **8b**

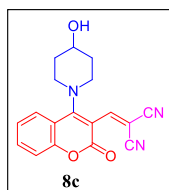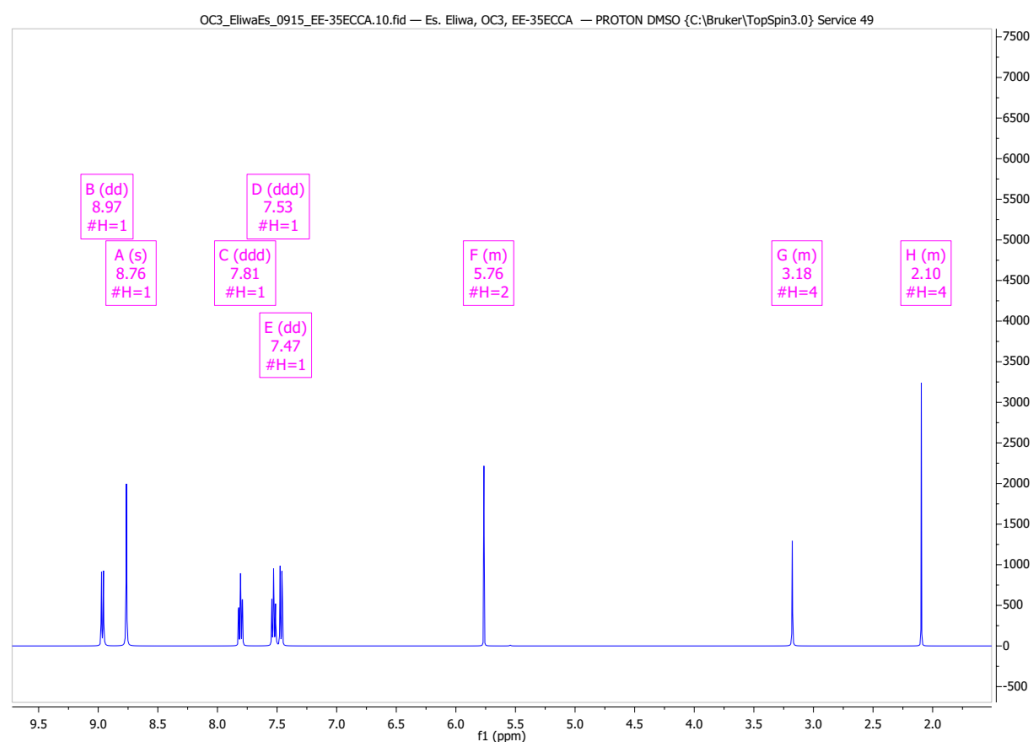

Figure S25. <sup>1</sup>H NMR (500 MHz, DMSO-*d*<sub>6</sub>) of **8c**

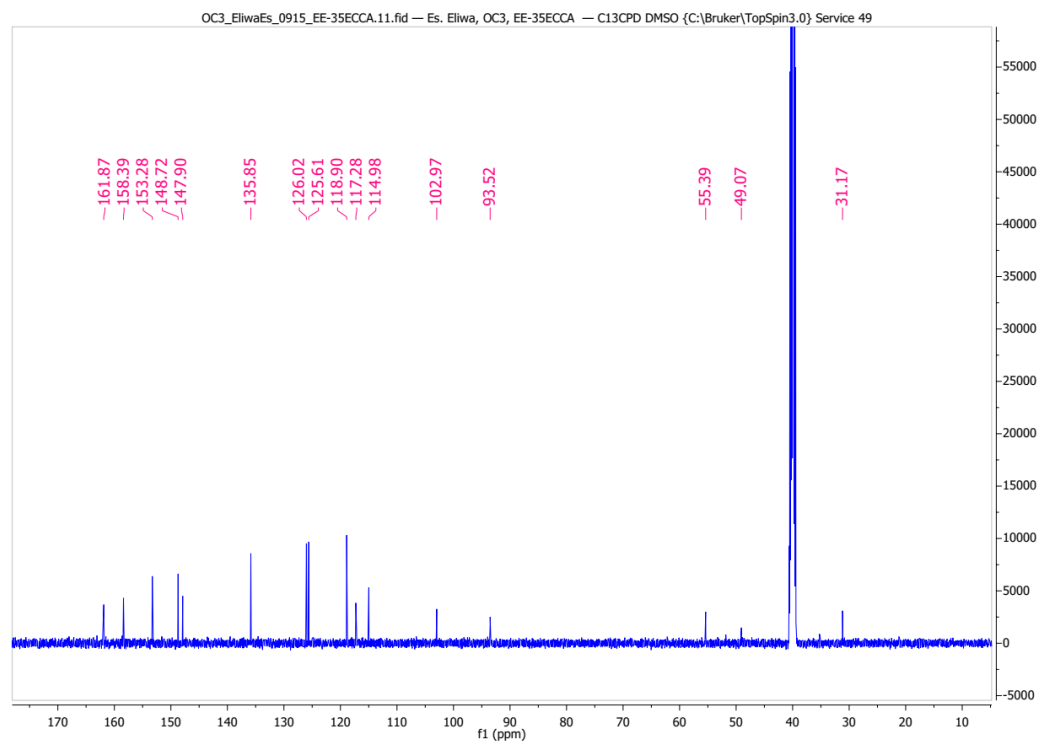

Figure S26. <sup>13</sup>C NMR (125 MHz, DMSO-*d*<sub>6</sub>) of **8c**



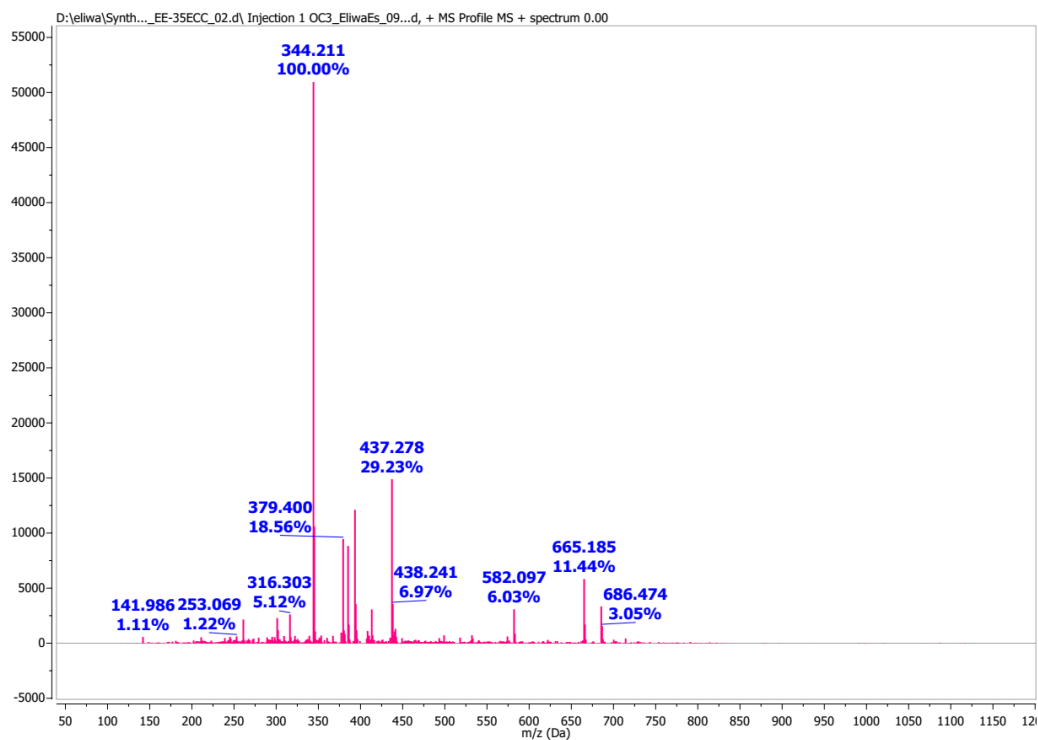**Figure S27.** (+)-ESI-MS of **8c**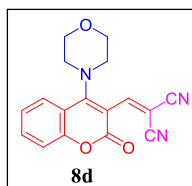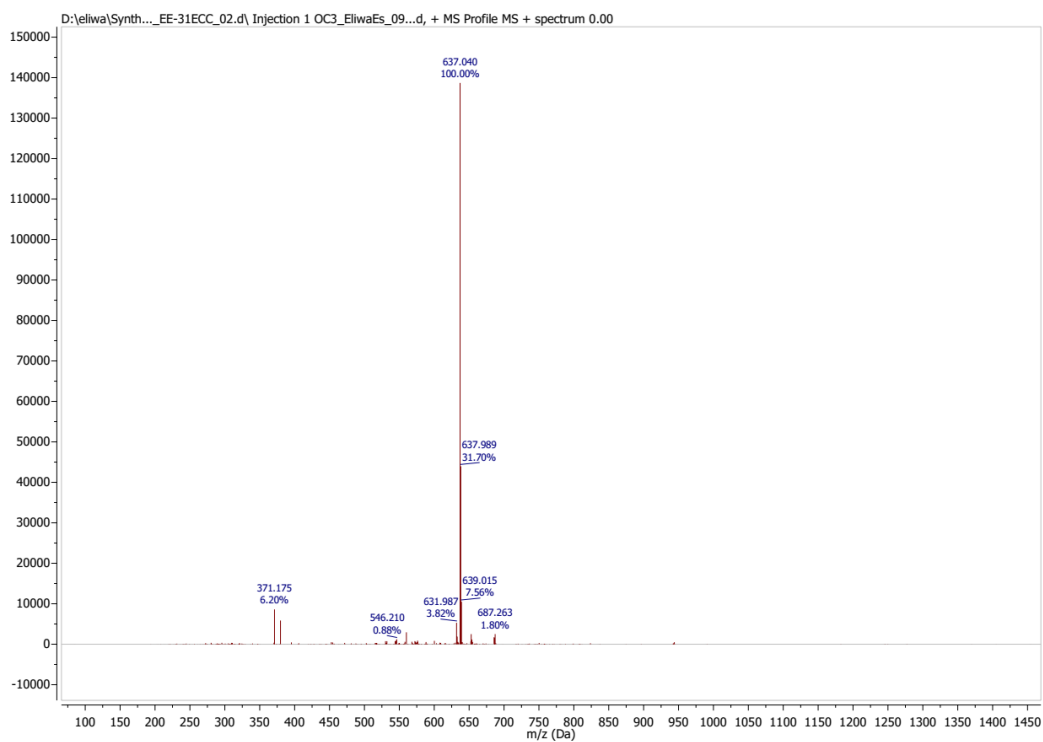**Figure S28.** (+)-ESI-MS of **8d**

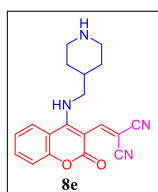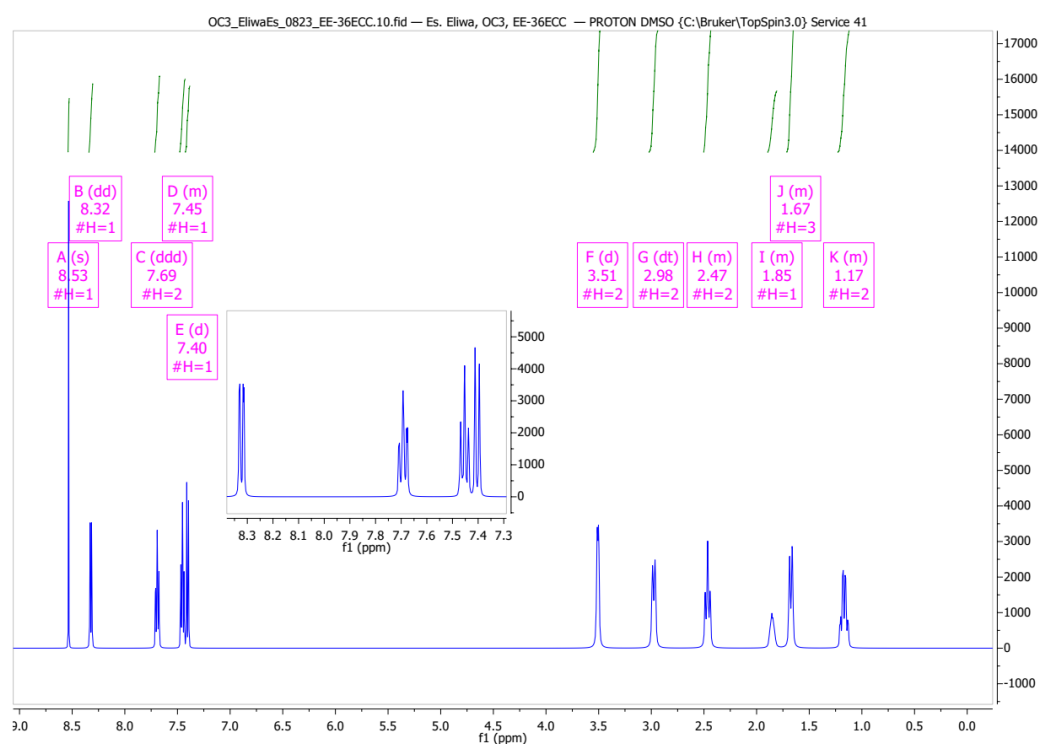

**Figure S29.**  $^1\text{H}$  NMR (500 MHz,  $\text{DMSO-}d_6$ ) of **8e**

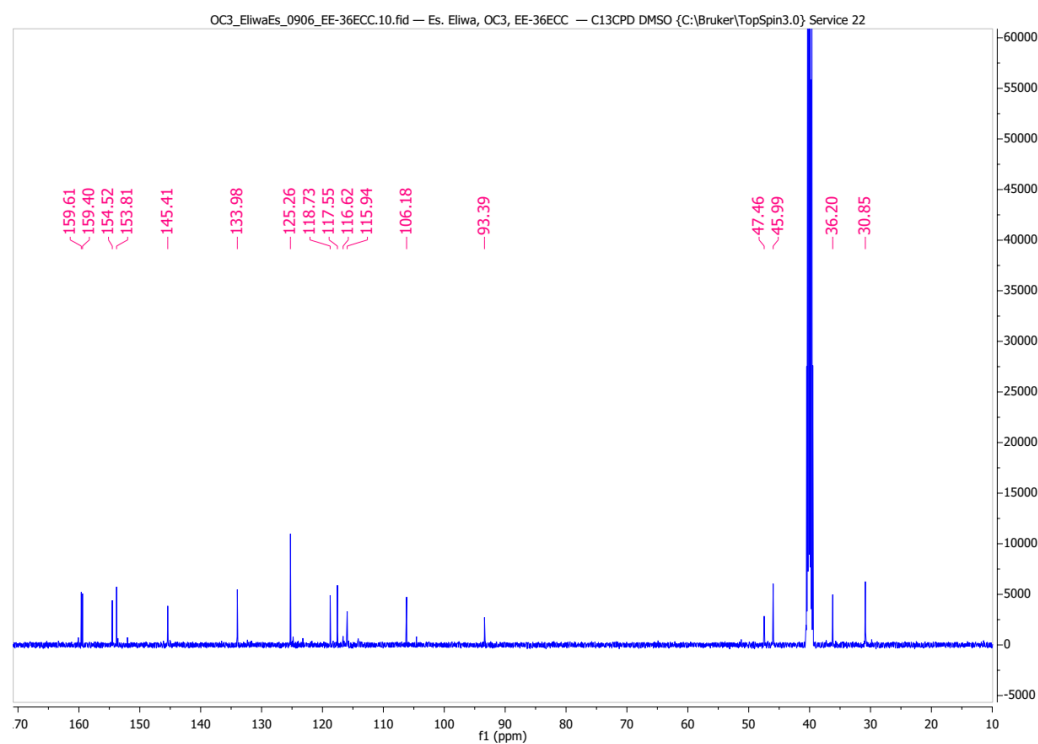

**Figure S30.**  $^{13}\text{C}$  NMR (125 MHz,  $\text{DMSO-}d_6$ ) of **8e**

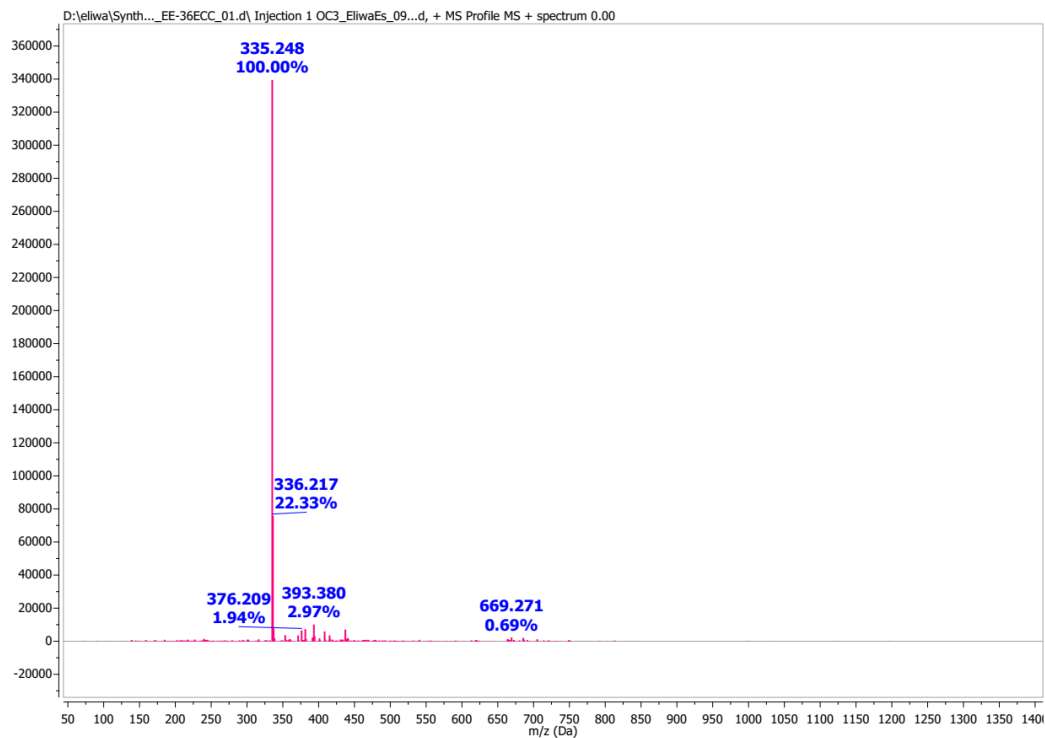**Figure S31.** (+)-ESI-MS of **8e**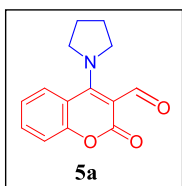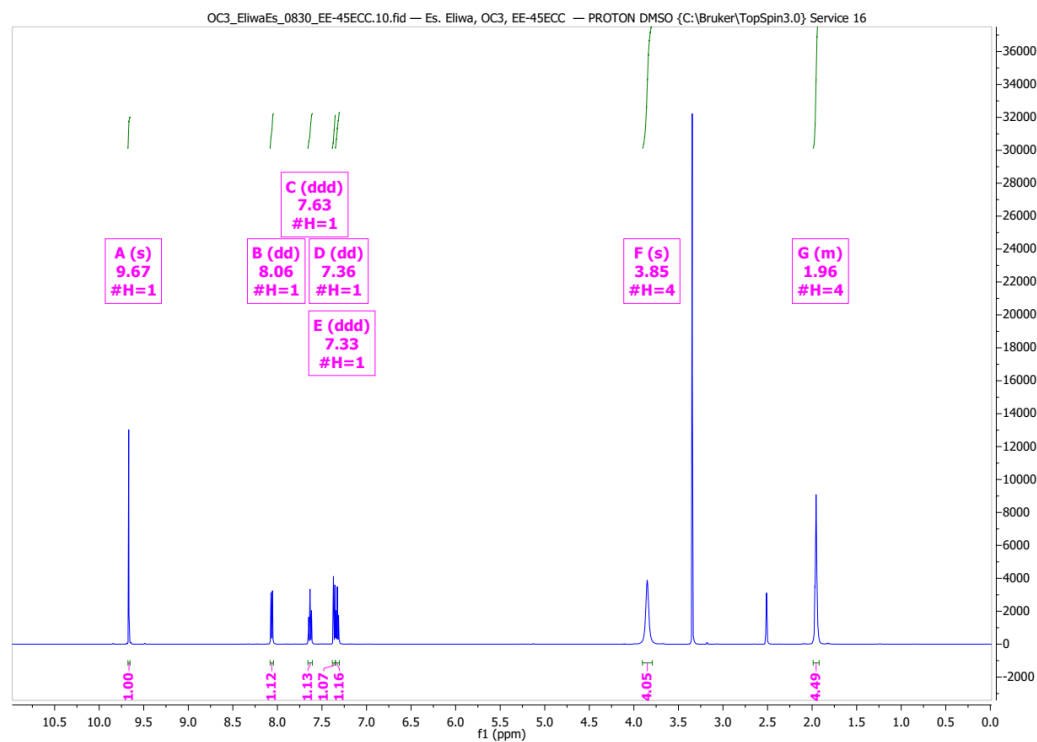**Figure S32.**  $^1\text{H}$  NMR (500 MHz,  $\text{DMSO-}d_6$ ) of **5a**

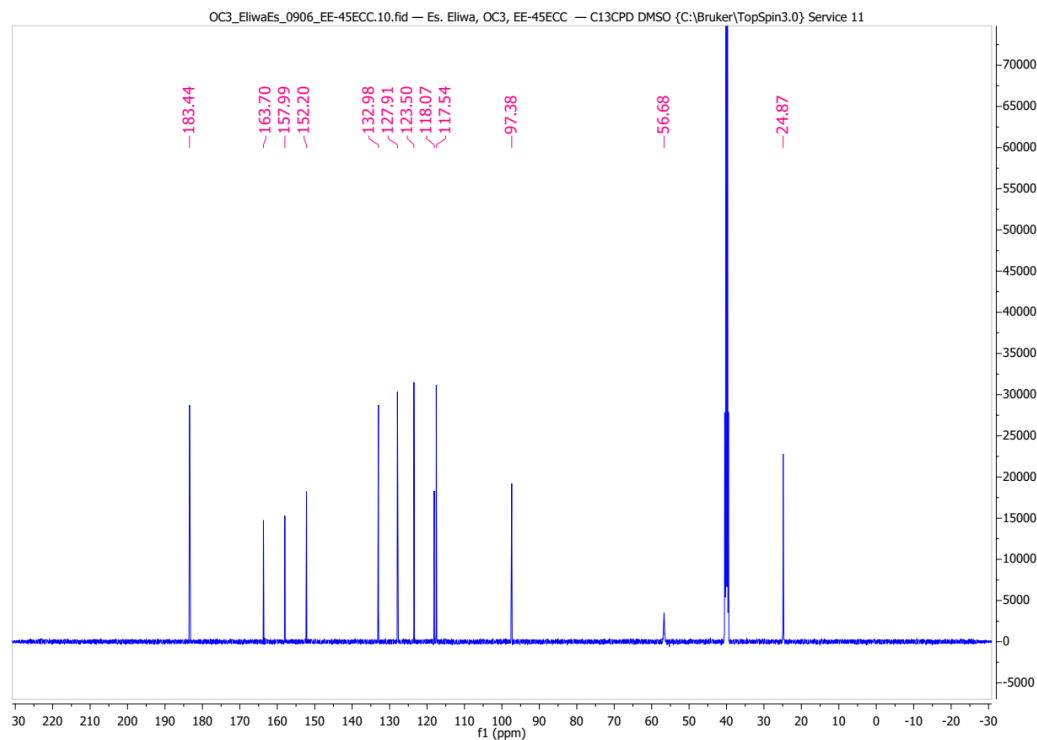

Figure S33.  $^{13}\text{C}$  NMR (125 MHz,  $\text{DMSO-}d_6$ ) of **5a**

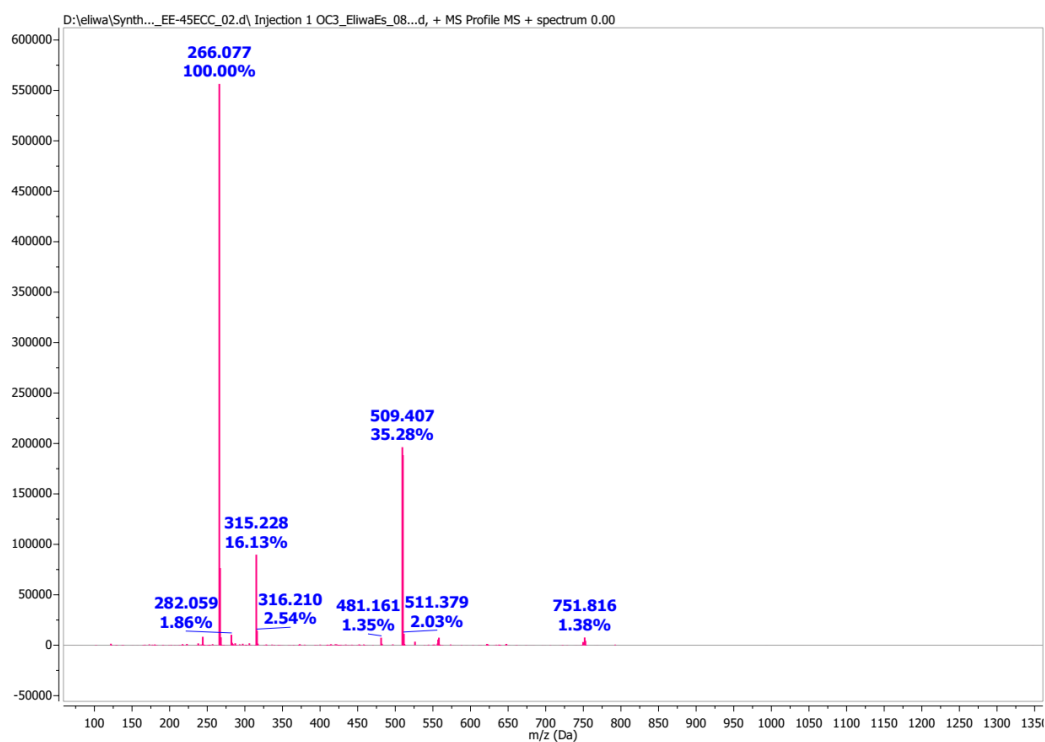

Figure S34. (+)-ESI-MS of **5a**

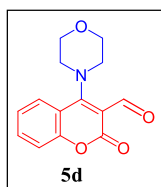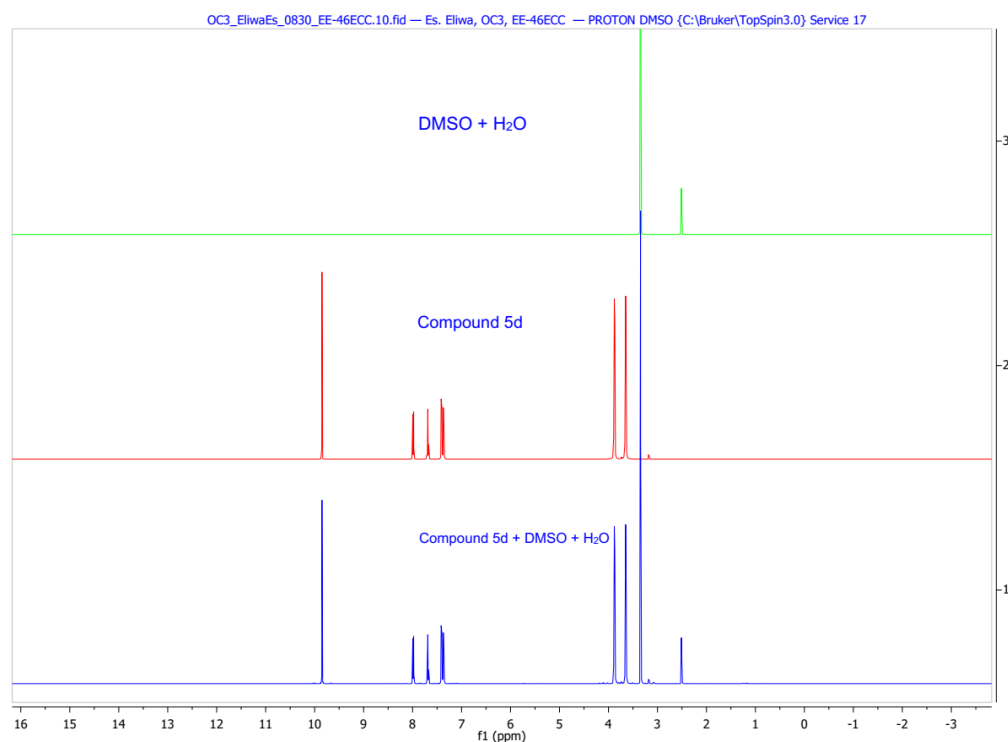

**Figure S35A.** <sup>1</sup>H NMR (500 MHz, DMSO-*d*<sub>6</sub>) of **5d**

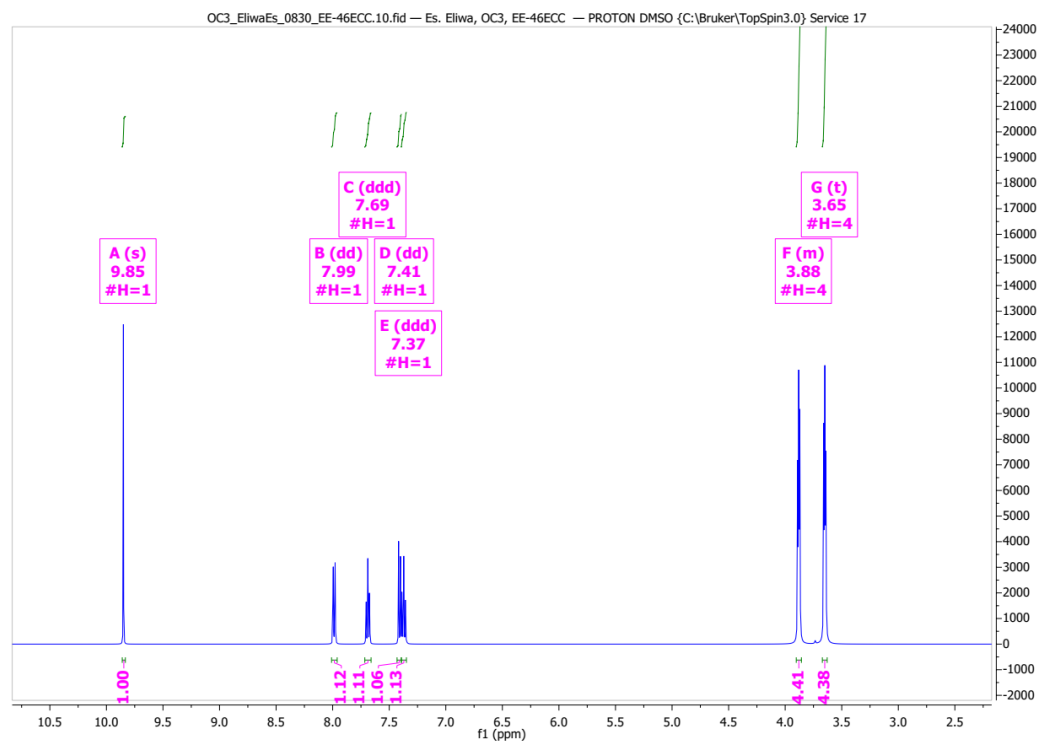

**Figure S35B.** <sup>1</sup>H NMR (500 MHz, DMSO-*d*<sub>6</sub>) of **5d**

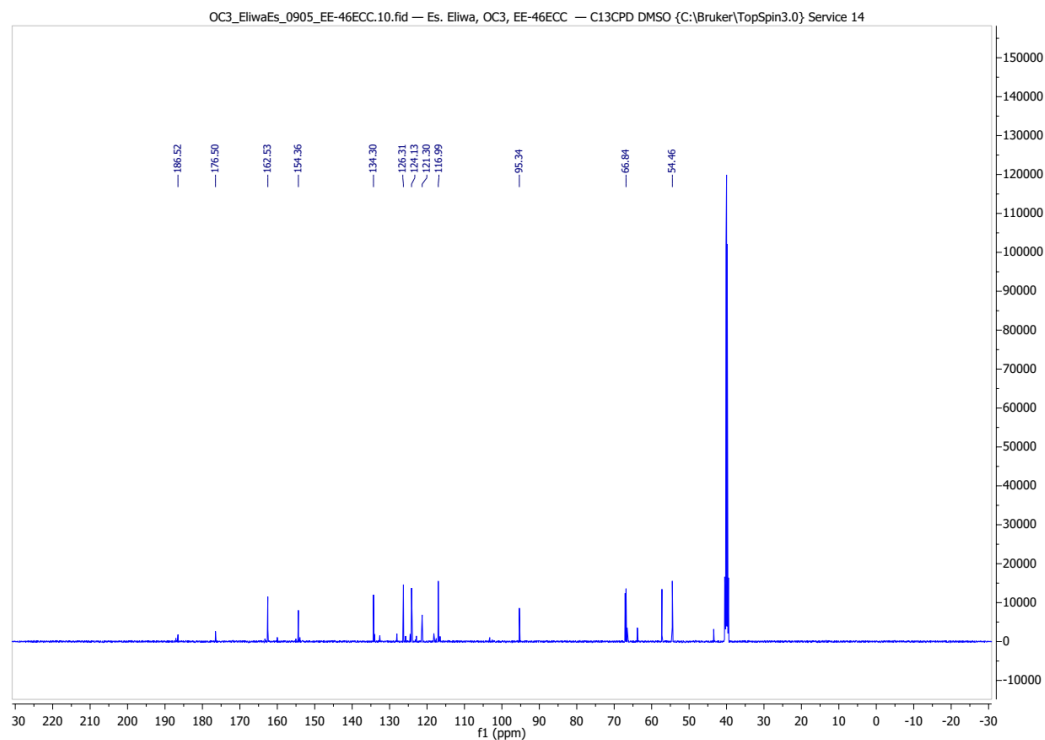

Figure S36.  $^{13}\text{C}$  NMR (125 MHz,  $\text{DMSO-}d_6$ ) of **5d**

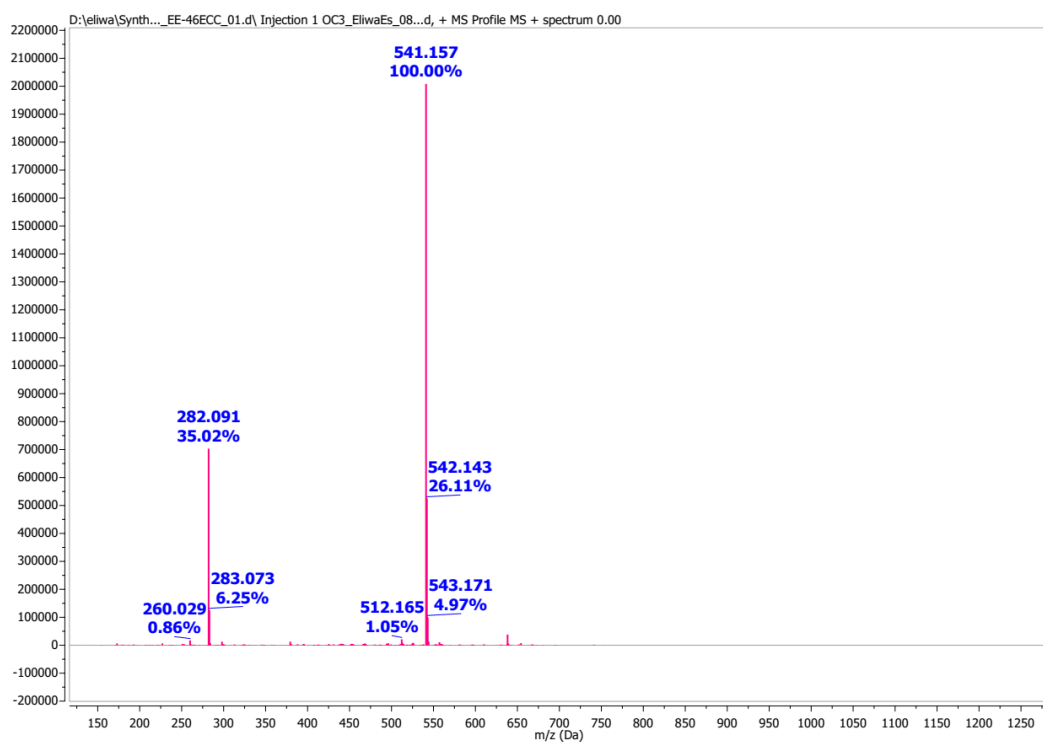

Figure S37. (+)-ESI-MS of **5d**

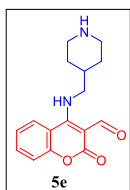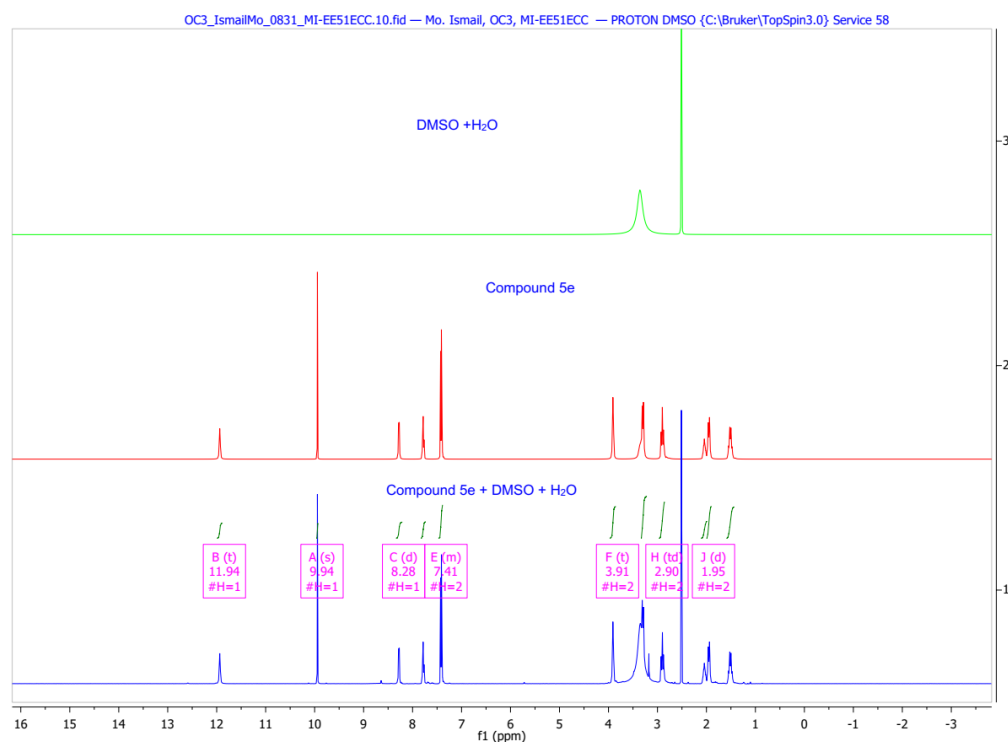

Figure S38A. <sup>1</sup>H NMR (500 MHz, DMSO-*d*<sub>6</sub>) of 5e

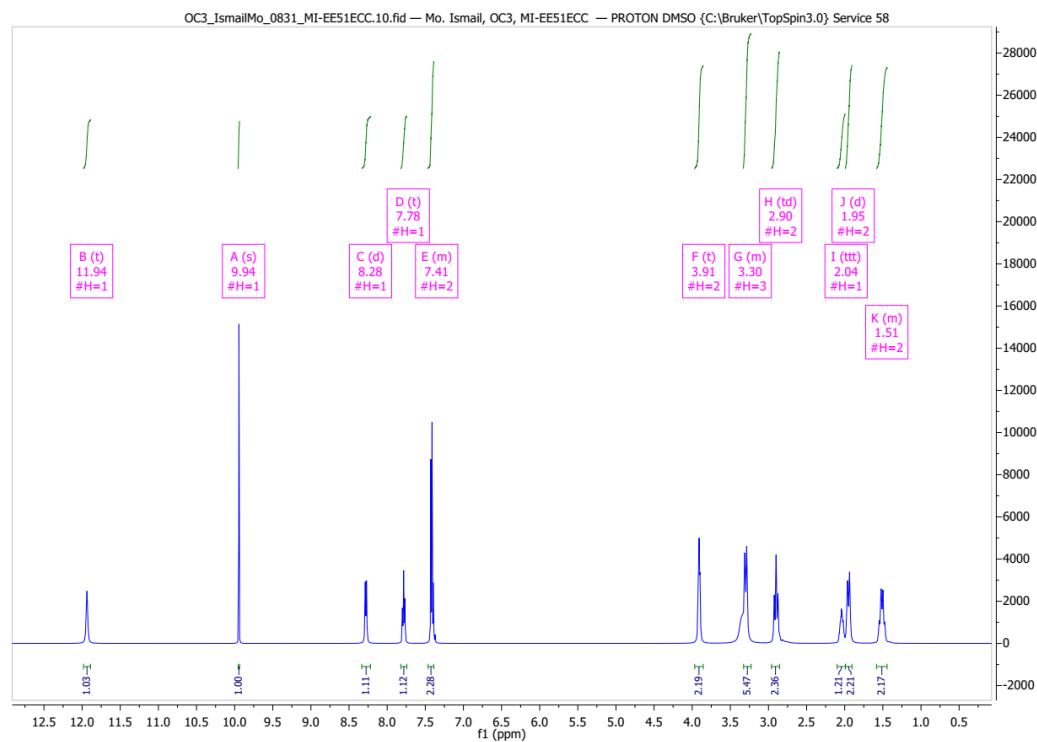

Figure S38B. <sup>1</sup>H NMR (500 MHz, DMSO-*d*<sub>6</sub>) of 5e

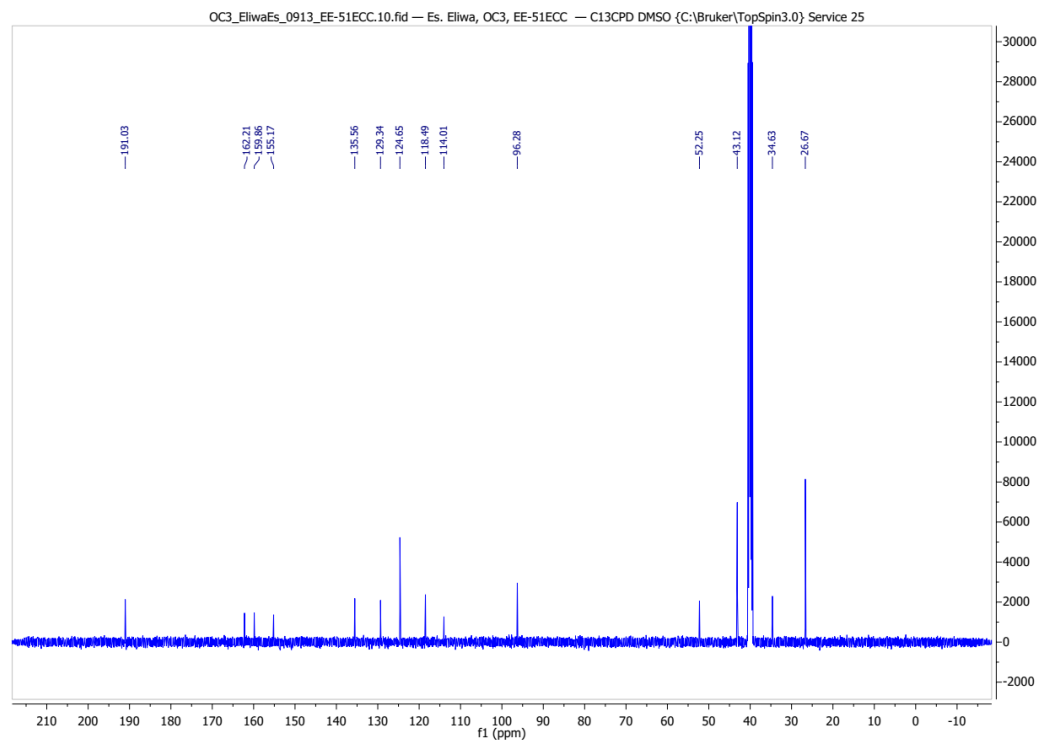

Figure S39.  $^{13}\text{C}$  NMR (125 MHz,  $\text{DMSO-}d_6$ ) of **5e**

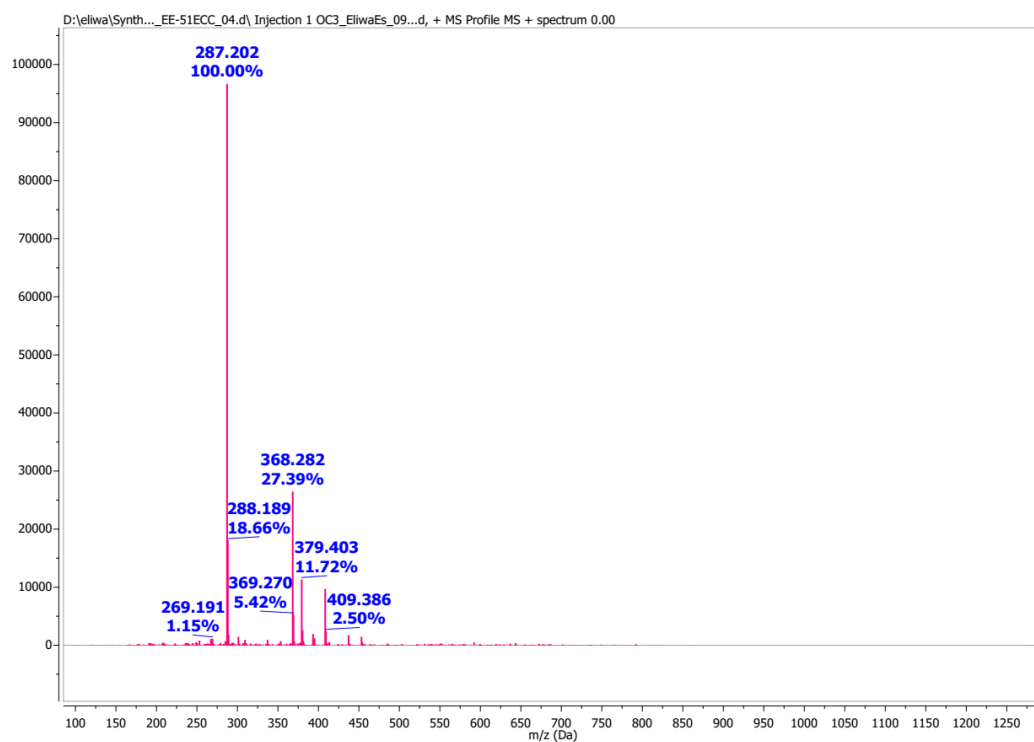

Figure S40. (+)-ESI-MS of **5e**



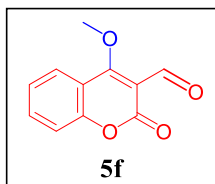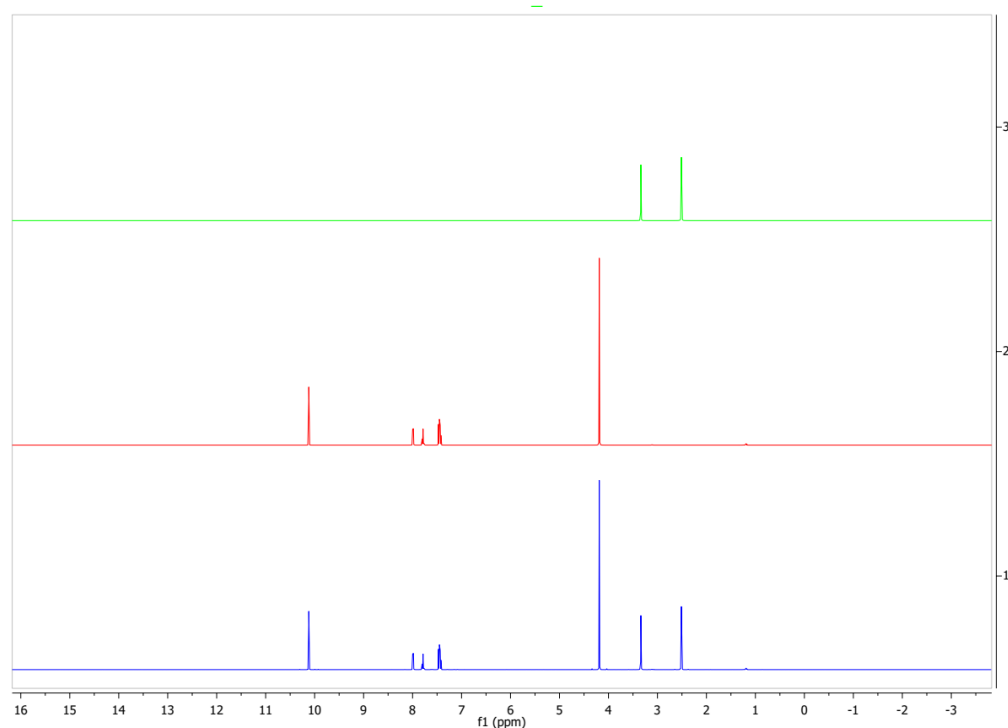

**Figure S41A.**  $^1\text{H}$  NMR (500 MHz,  $\text{DMSO}-d_6$ ) of **5f**

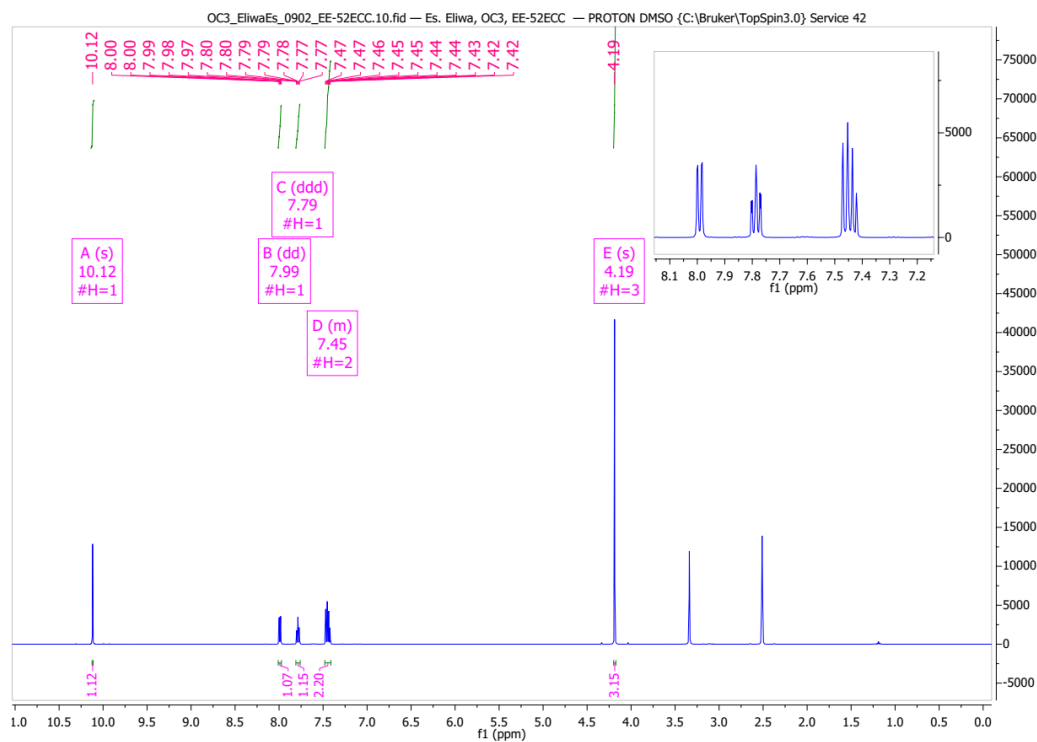

**Figure S41B.**  $^1\text{H}$  NMR (500 MHz,  $\text{DMSO}-d_6$ ) of **5f**

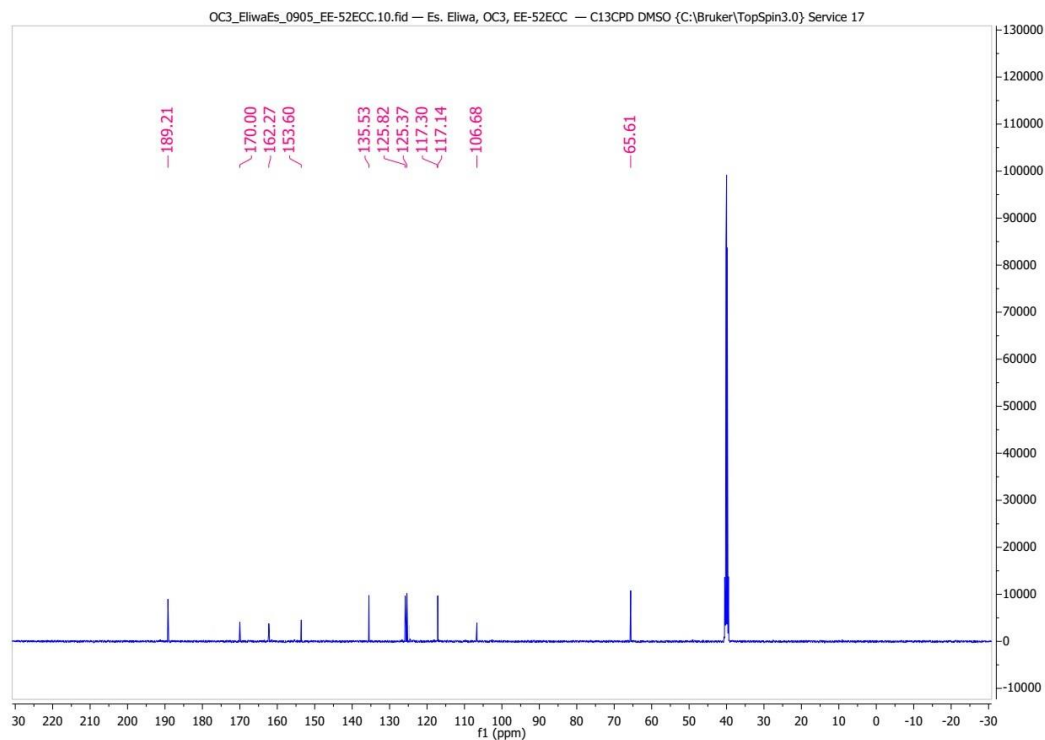

**Figure S42.**  $^{13}\text{C}$  NMR (125 MHz,  $\text{DMSO-}d_6$ ) of **5f**

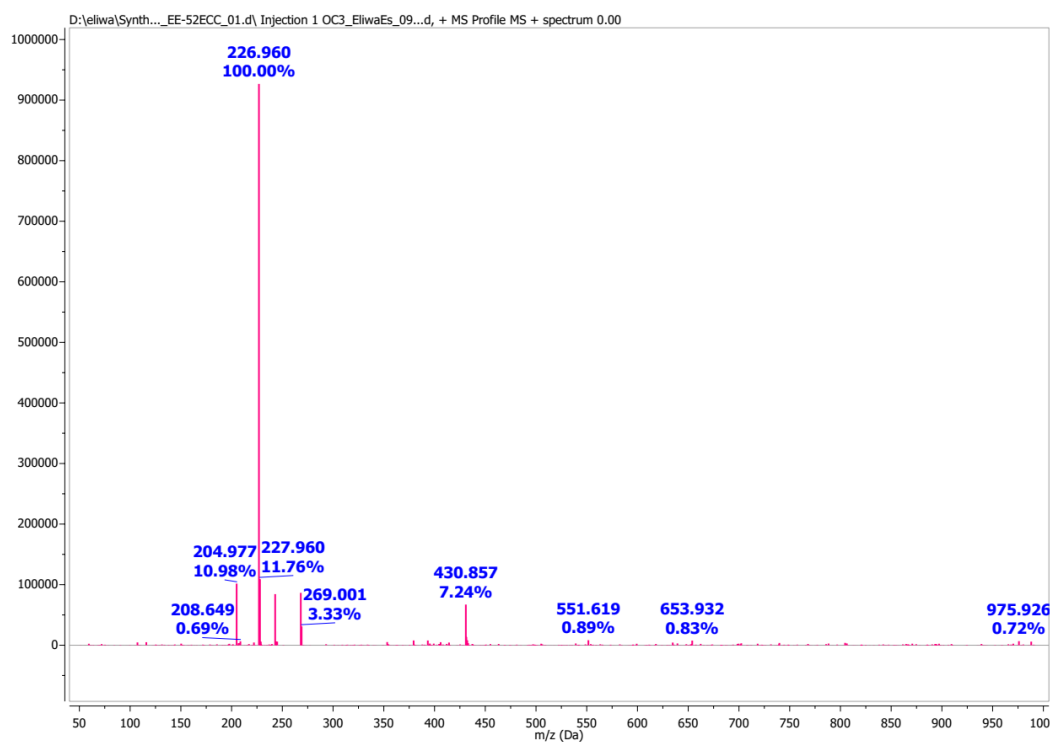

**Figure S43.** (+)-ESI-MS of **5f**

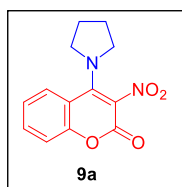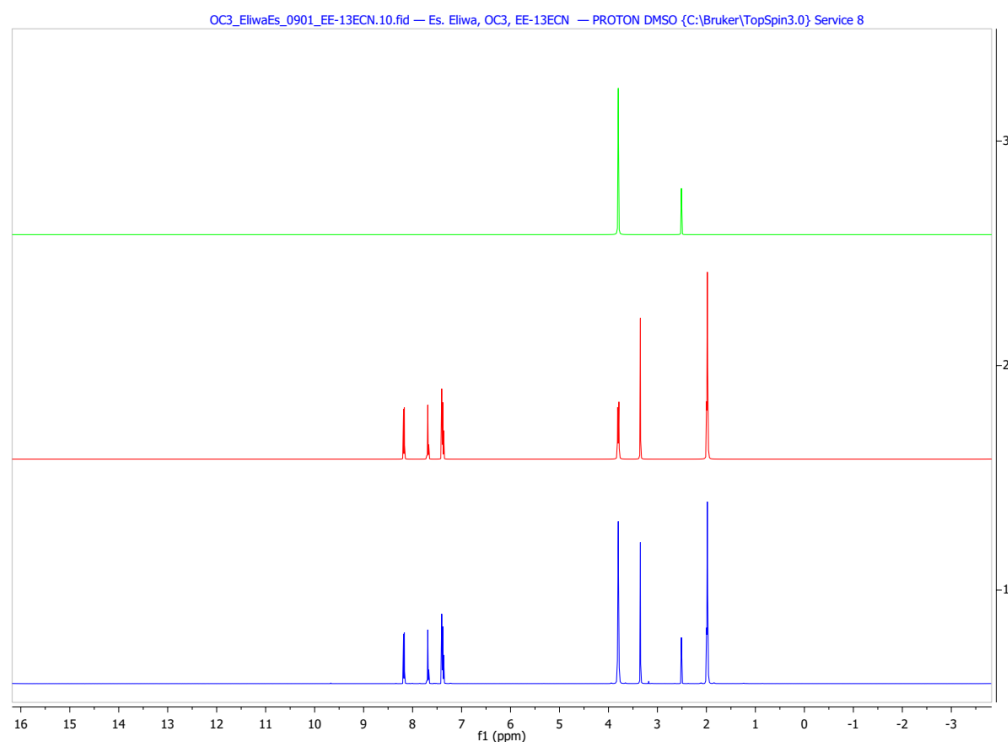

**Figure S44A.**  $^1\text{H}$  NMR (500 MHz,  $\text{DMSO-}d_6$ ) of **9a**

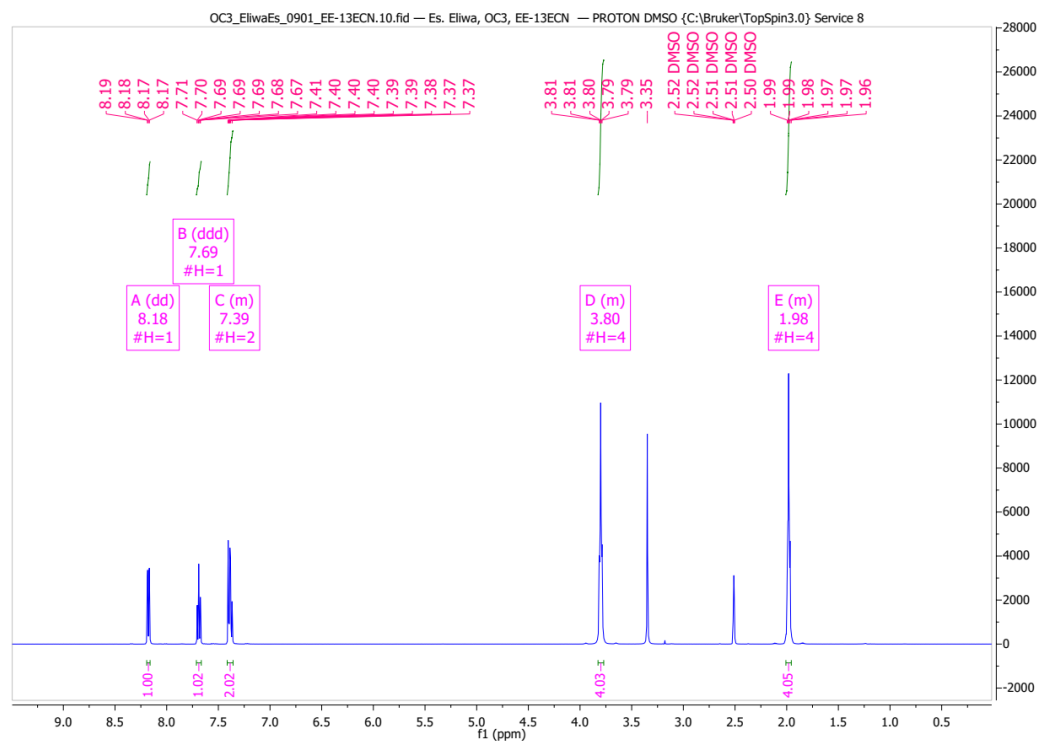

**Figure S44B.**  $^1\text{H}$  NMR (500 MHz,  $\text{DMSO-}d_6$ ) of **9a**

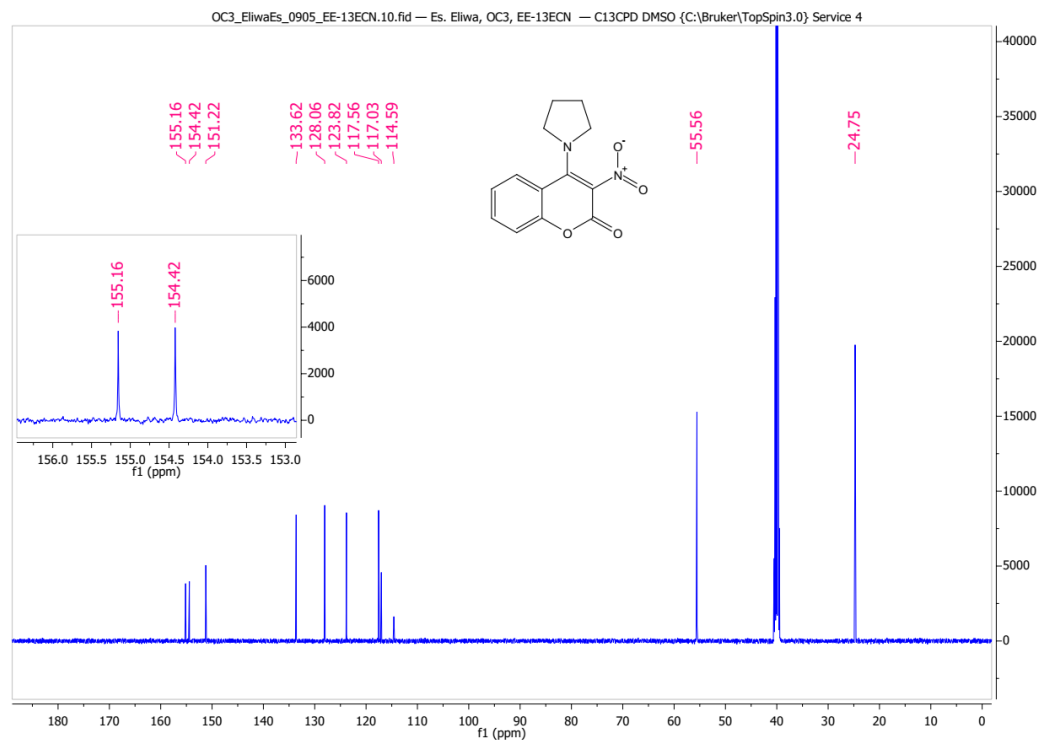

Figure S45.  $^{13}\text{C}$  NMR (125 MHz,  $\text{DMSO-}d_6$ ) of **9a**

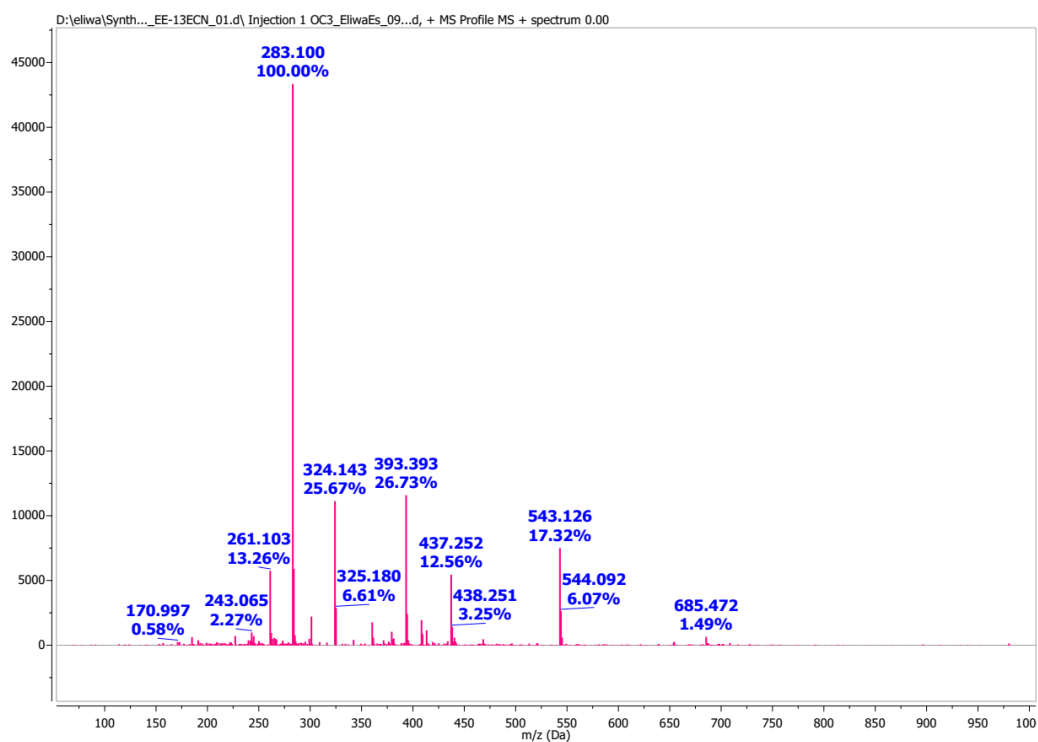

Figure S46. (+)-ESI-MS of **9a**

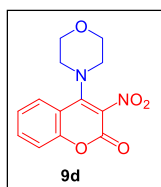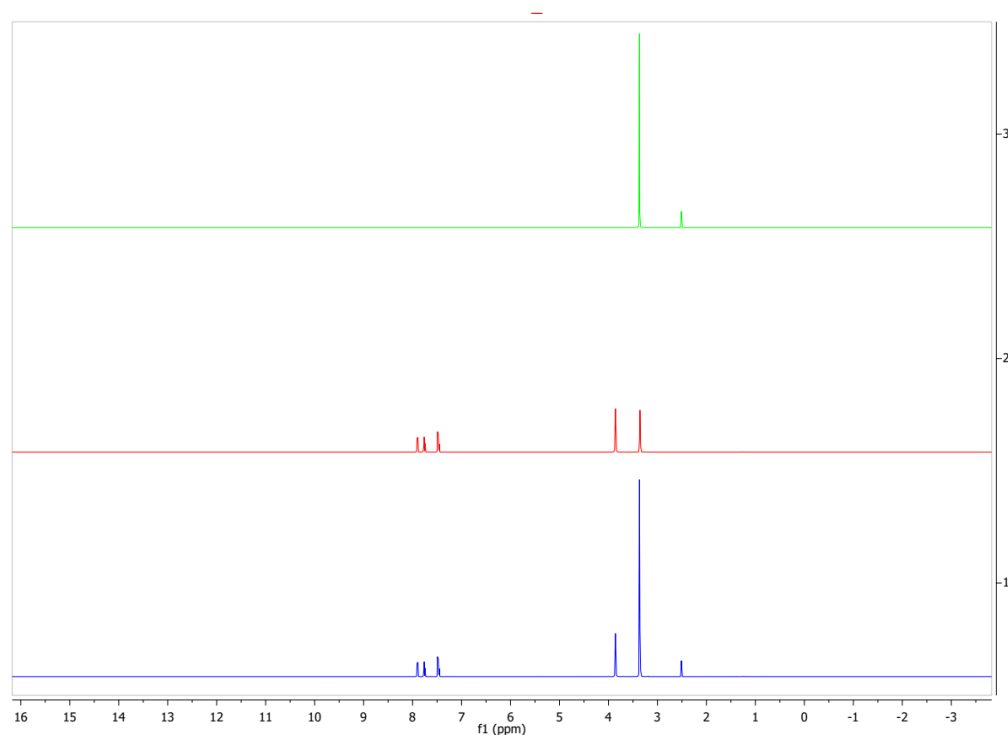

**Figure S47A.**  $^1\text{H}$  NMR (500 MHz,  $\text{DMSO}-d_6$ ) of **9d**

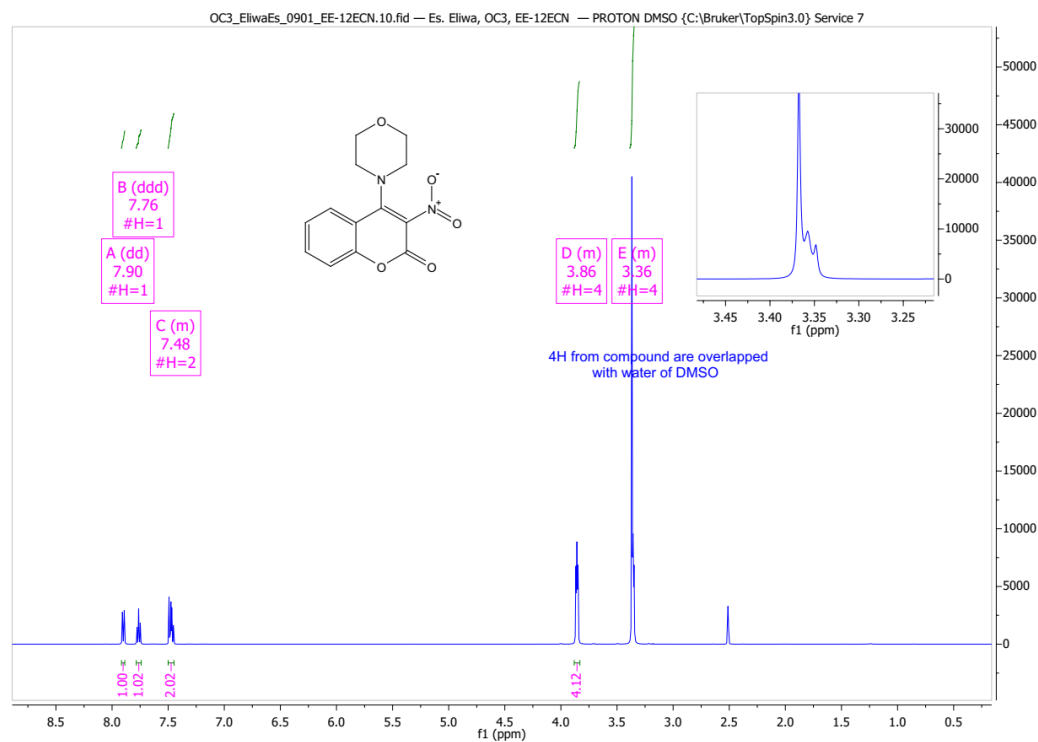

**Figure S47B.**  $^1\text{H}$  NMR (500 MHz,  $\text{DMSO}-d_6$ ) of **9d**

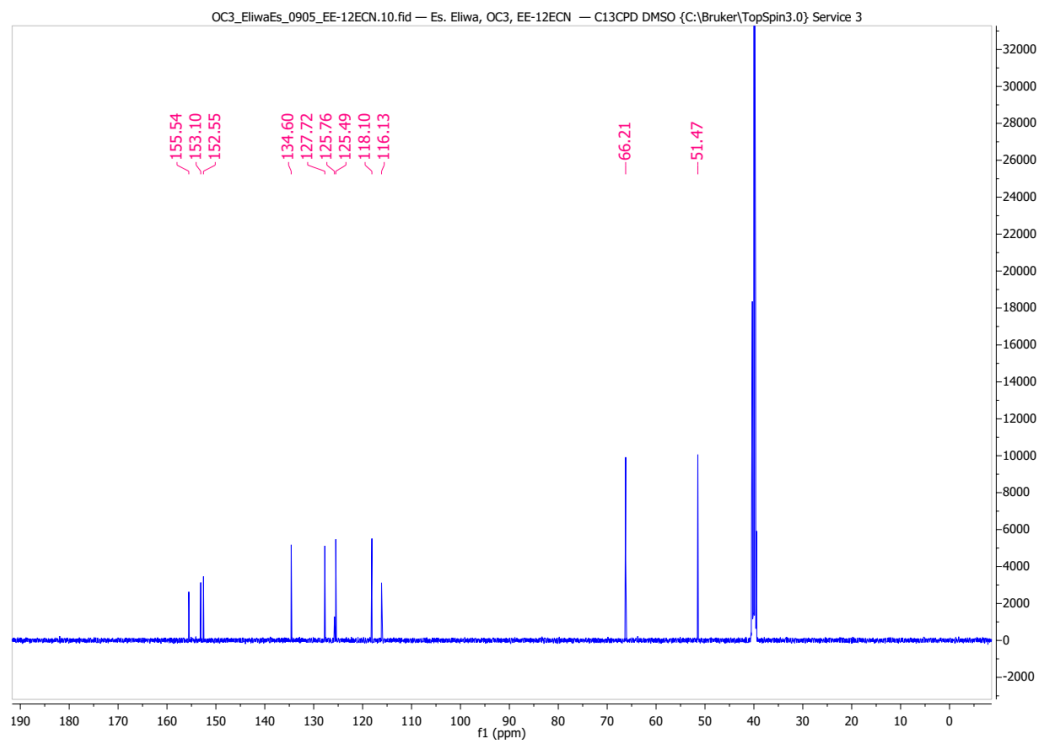

**Figure S48.**  $^{13}\text{C}$  NMR (125 MHz, DMSO- $d_6$ ) of **9d**

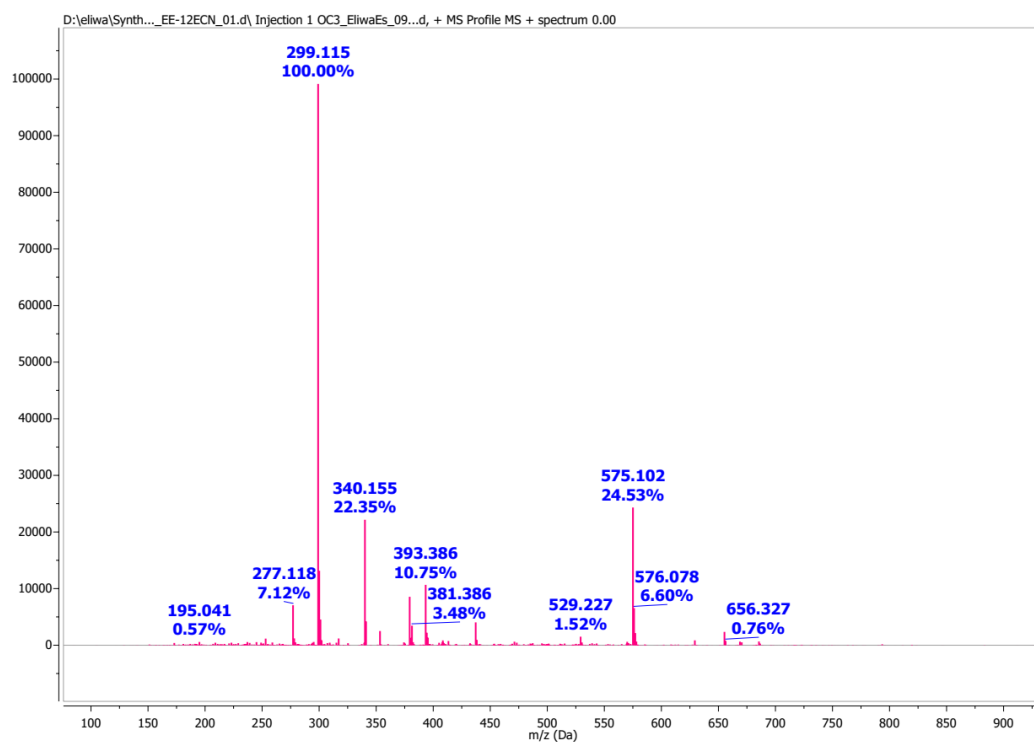

**Figure S49.** (+)-ESI-MS of **9d**

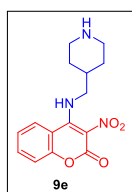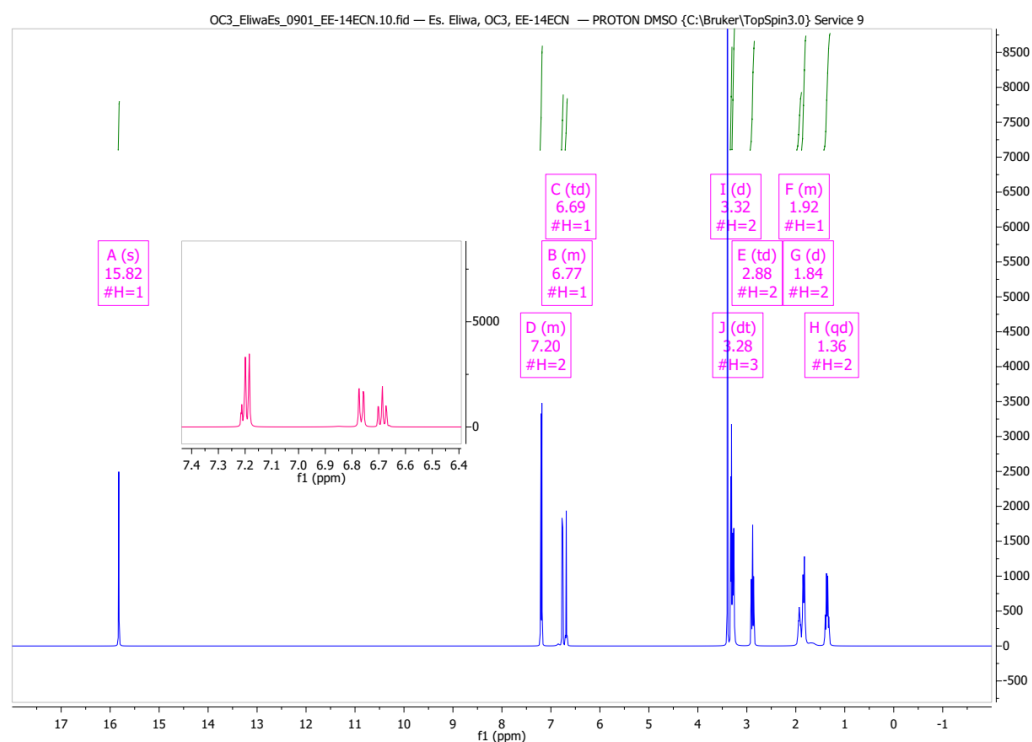

**Figure S50.**  $^1\text{H}$  NMR (500 MHz,  $\text{DMSO-}d_6$ ) of **9e**

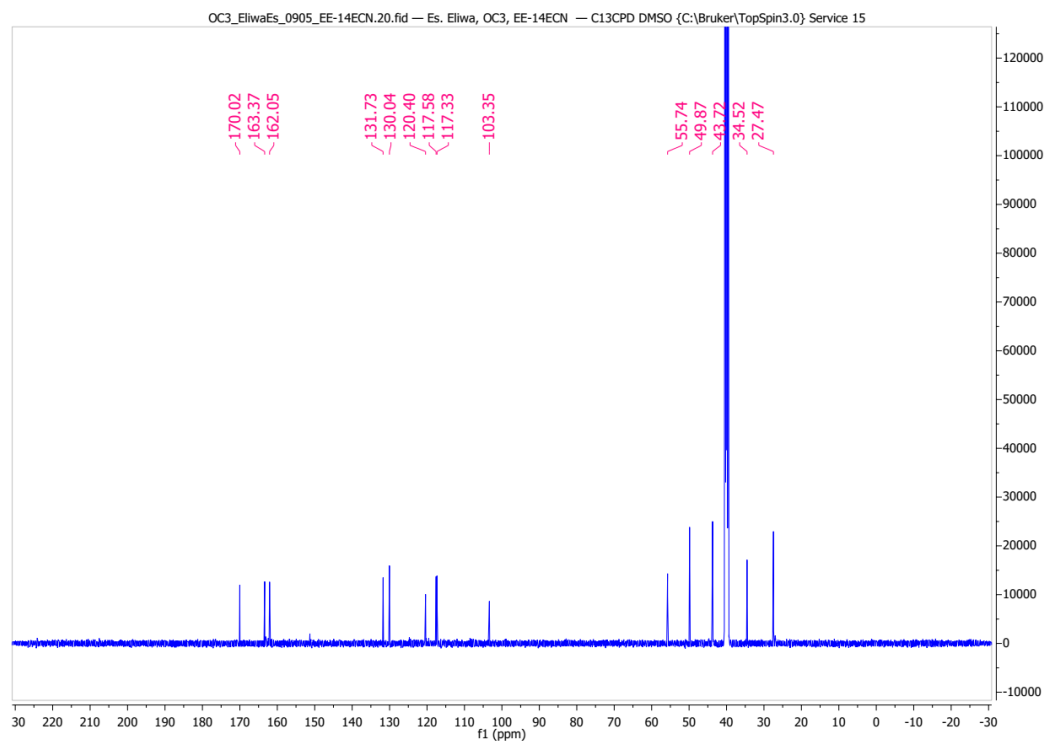

**Figure S51.**  $^{13}\text{C}$  NMR (125 MHz,  $\text{DMSO-}d_6$ ) of **9e**

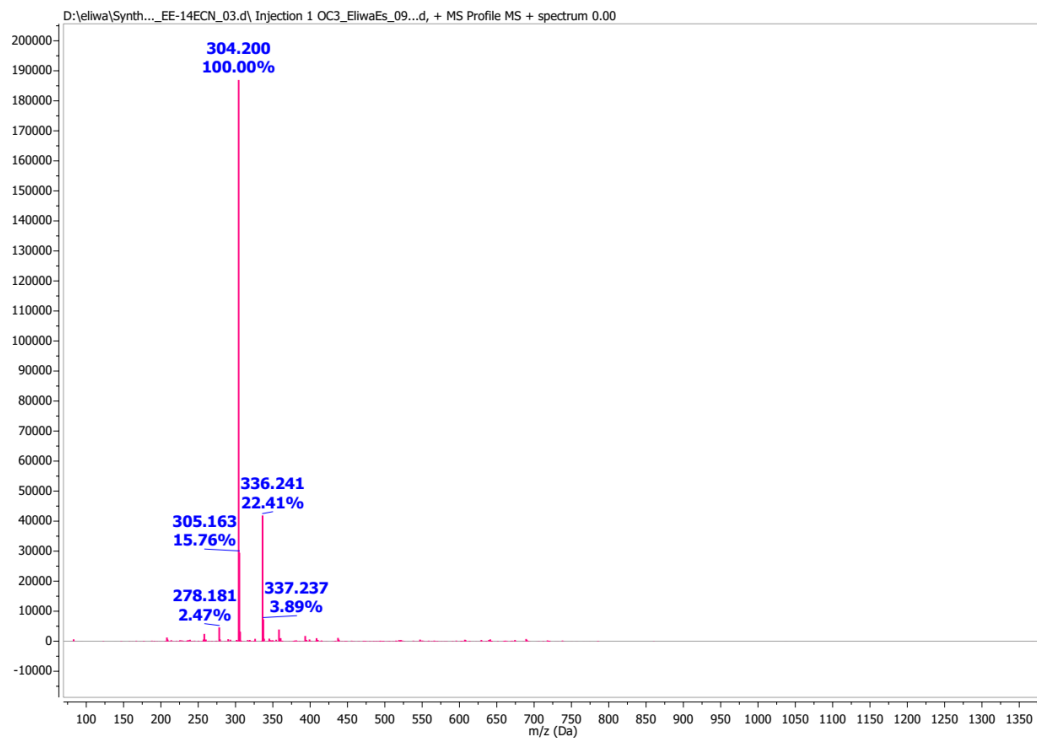**Figure S52.** (+)-ESI-MS of **9e**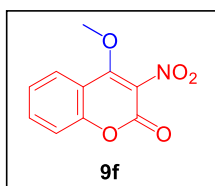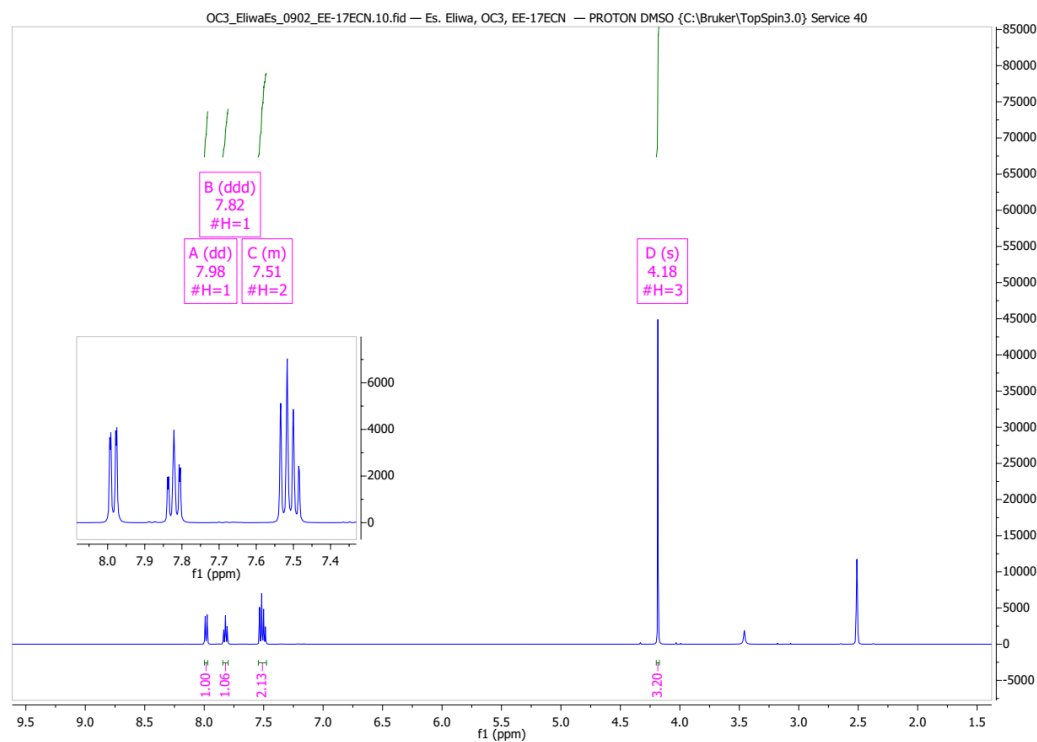**Figure S53.**  $^1\text{H}$  NMR (500 MHz,  $\text{DMSO-}d_6$ ) of **9f**



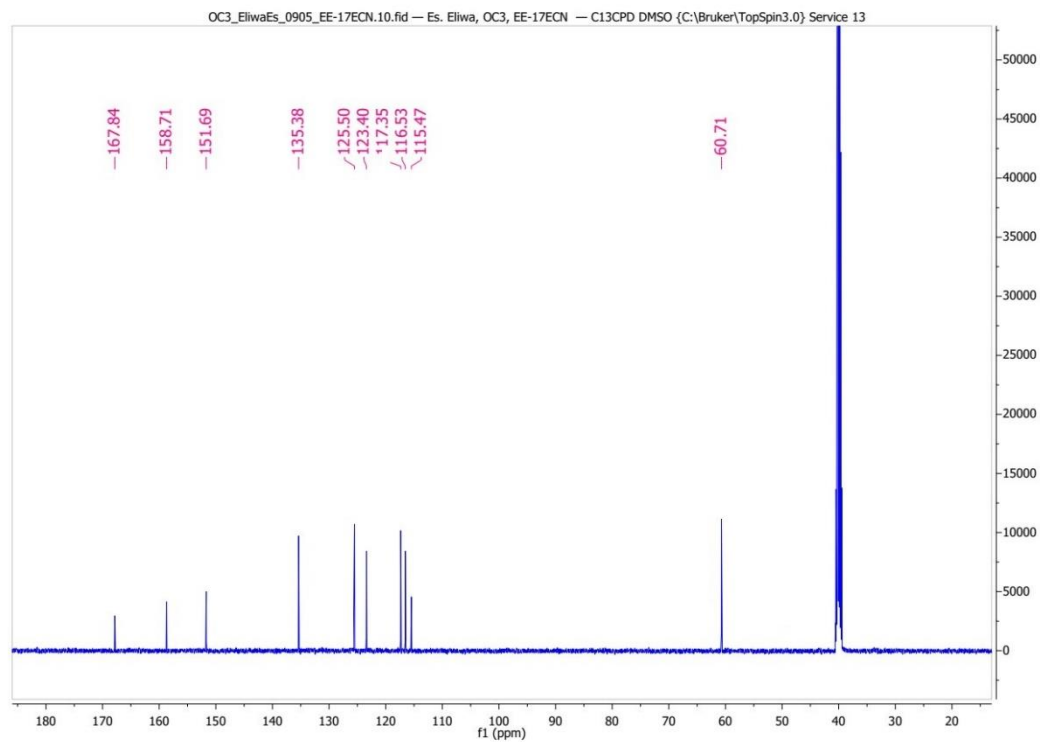

Figure S54.  $^{13}\text{C}$  NMR (125 MHz,  $\text{DMSO}-d_6$ ) of **9f**

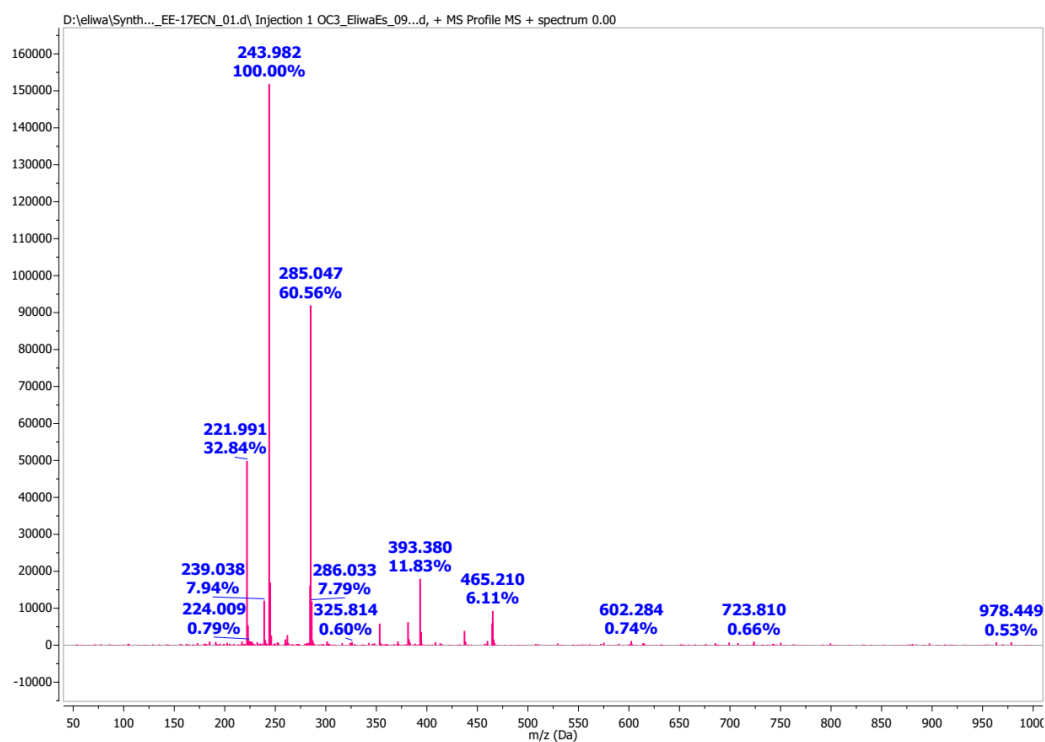

Figure S55. (+)-ESI-MS of **9f**
